# Supplementary material for: Genes and evolutionary fates of the amanitin biosynthesis pathway in poisonous mushrooms
Source: PubMed Central journal article supplement — Proc Natl Acad Sci U S A. 2022 May 9;119(20):e2201113119. doi: 10.1073/pnas.2201113119 (PMC9171917; doi:10.1073/pnas.2201113119), 2022-05-09
Supplement: pnas.2201113119.sapp.pdf [file pnas.2201113119.sapp.pdf]

## **Supplementary Information for**

### **Novel genes and evolutionary fates of the amanitin biosynthesis pathway in poisonous mushrooms**

Hong Luo<sup>1</sup>, Heather Hallen-Adams<sup>2</sup>, Yunjiao Lüli<sup>2</sup>, R. Michael Sgambelluri, Xuan Li, Miranda Smith, Zhu L. Yang, Francis M. Martin<sup>1</sup>

<sup>1</sup>To whom correspondence may be addressed. Email: [francis.martin@inrae.fr](mailto:francis.martin@inrae.fr) or [luohong@mail.kib.ac.cn](mailto:luohong@mail.kib.ac.cn)

<sup>2</sup>These authors contributed equally.

#### **This PDF file includes:**

Figures S1 to S15  
Tables S1 to S6

#### **Other supplementary materials for this manuscript include the following:**

Datasets S1 to S3

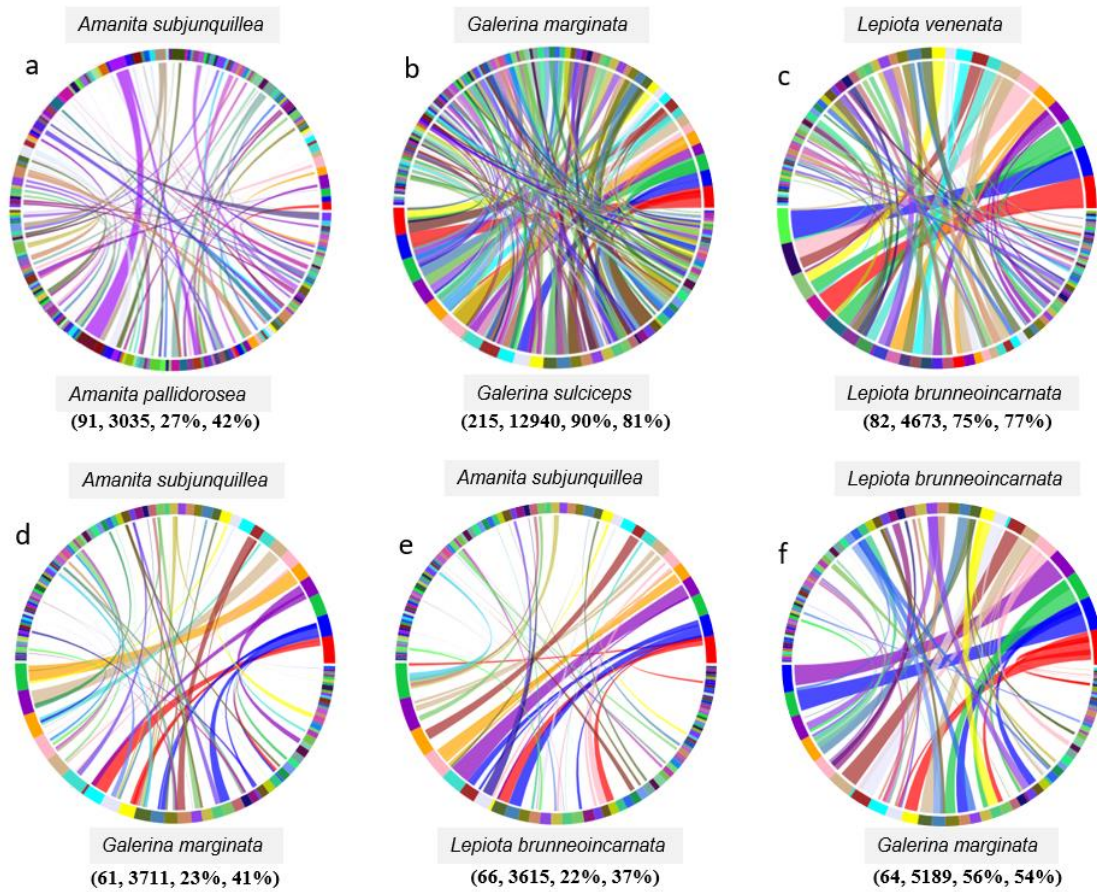

**Fig. S1.** Synteny analyses of the genomes of amanitin-producing agarics. Genome synteny within respective genus is indicated in the upper row, and the synteny between genera shown in the bottom row. Ribbons indicate genomic regions with significant synteny, and density of the ribbons represents syntenic levels. Statistics below each section are numbers of synteny block, anchor, block coverage of the species on the top, and block coverage of the species at the bottom.

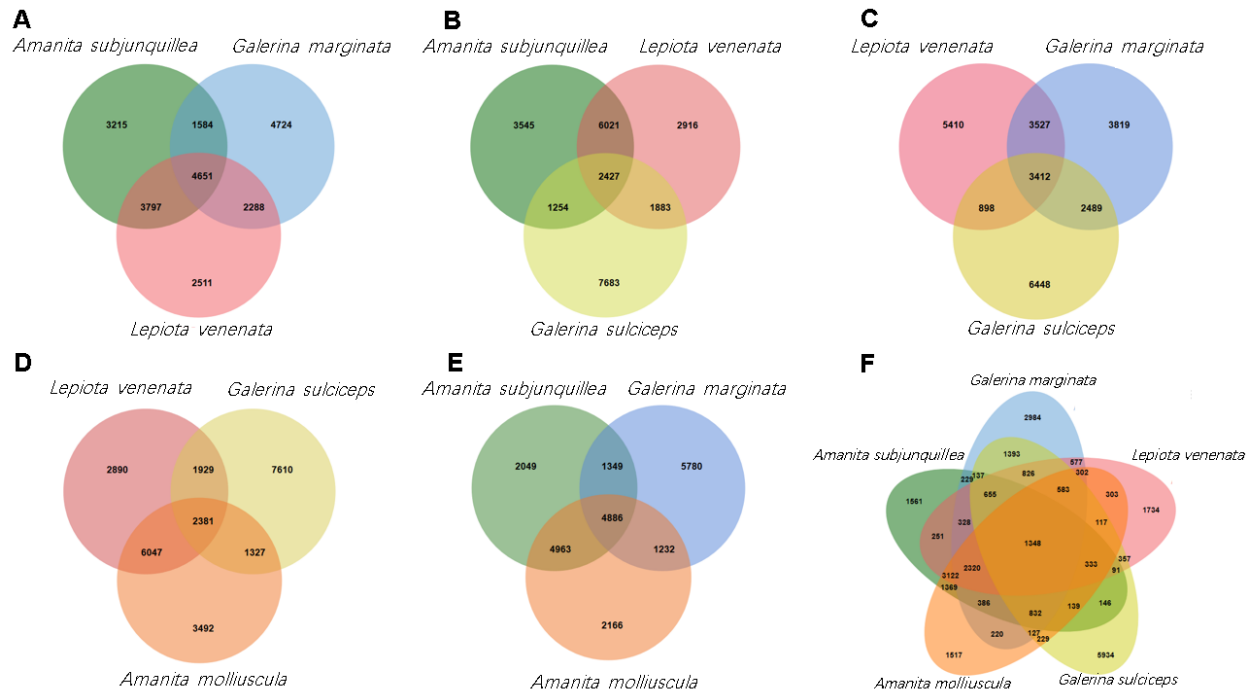

**Fig. S2.** Venn diagrams of predicted orthogroups in amanitin-producing *Amanita*, *Lepiota* and *Galerina* species. Species names are labeled above or beneath each circle.

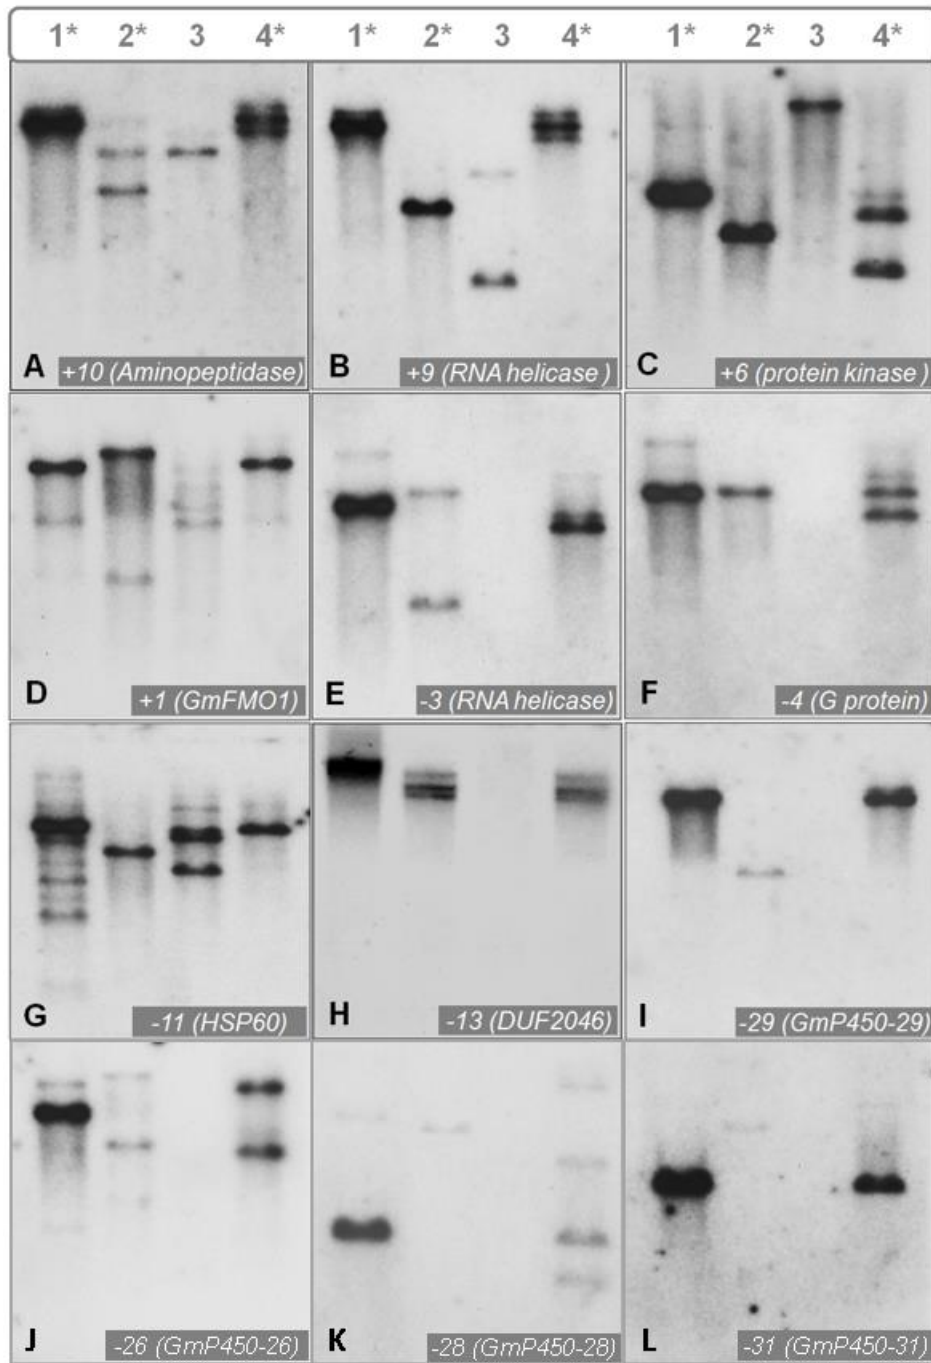

**Fig. S3.** DNA blotting of genes in the vicinity of *GmAMA1-1* in amanitin-producing and amanitin non-producing *Galerina* species. Lanes 1, *G. marginata*; Lanes 2, *G. badipes*; Lanes 3, *G. hybrida*; Lanes 4, *G. venenata*. Asterisks indicate toxin-producing species. Gene number: position upstream (-) or downstream (+) of *GmAMA1-1*. Four *CYP450* orthologs (I-L) are present in three amanitin-producing species and absent from the amanitin-nonproducing species.

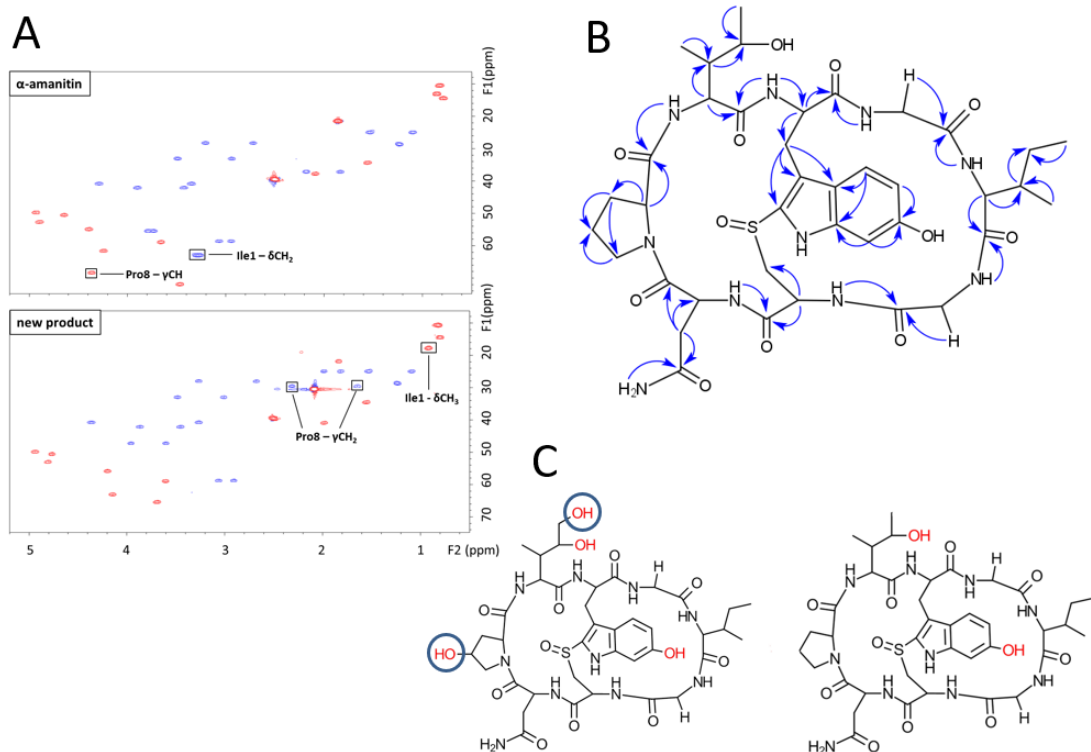

**Fig. S4.** Structure of  $\theta$ -amanitin. (A)  $^1\text{H}$ - $^{13}\text{C}$  HSQC spectra of  $\alpha$ -amanitin and  $\theta$ -amanitin with major differences indicated. (B) Key HMBC correlations in  $\theta$ -amanitin. (C) Structures of  $\alpha$ -amanitin (left) and  $\theta$ -amanitin (right): two blue circles indicate the missing hydroxyl groups in  $\theta$ -amanitin.

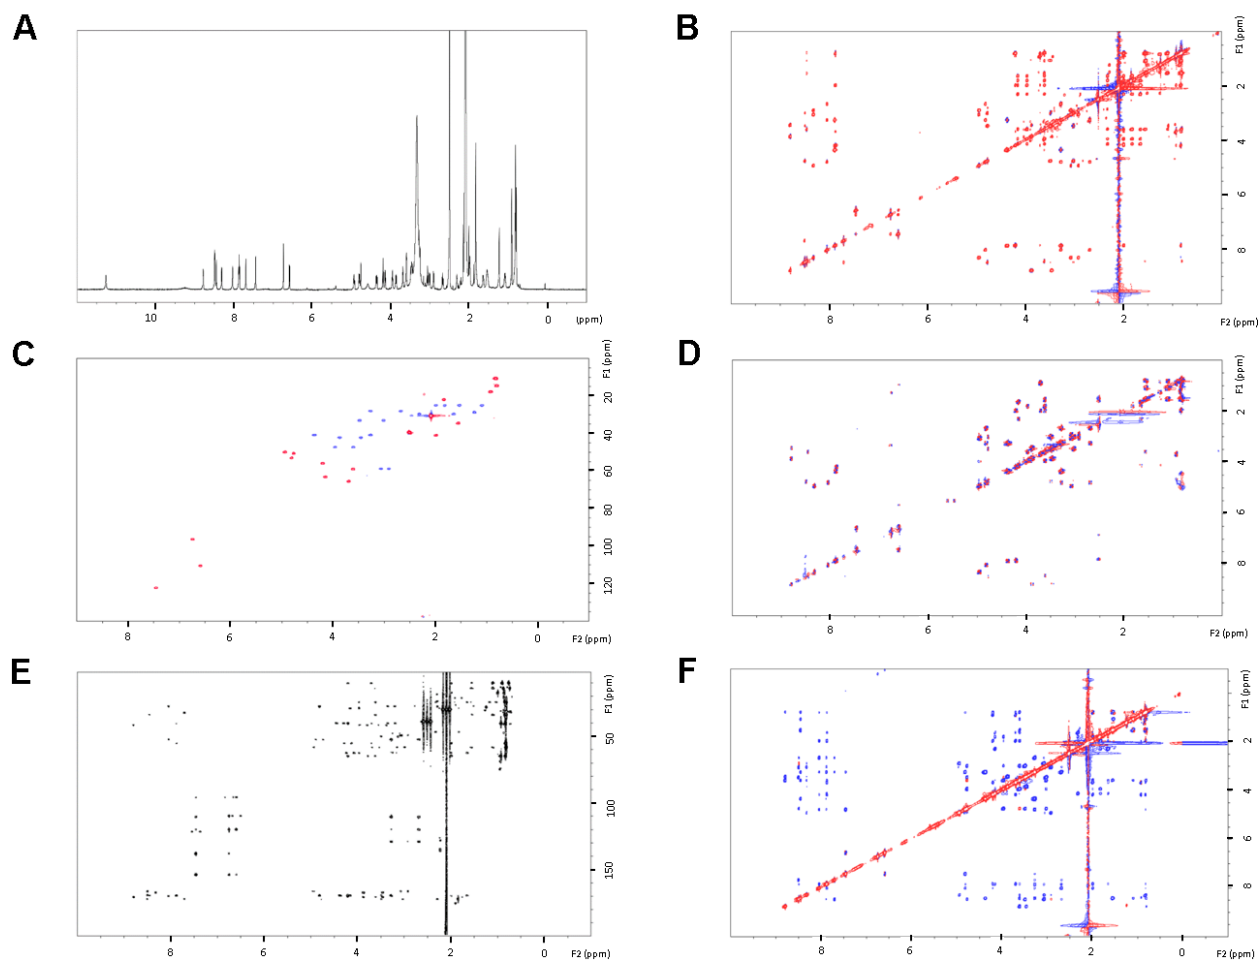

**Fig. S5.** 1D and 2D NMR analyses of  $\theta$ -amanitin from *GmP450-29* mutant. (A)  $^1\text{H}$ -NMR spectrum. (B) TOCSY spectrum. (C)  $^1\text{H}$ - $^{13}\text{C}$ -HSQC spectrum, a section of this spectrum is shown in the main text as supplementary Fig. 5. (D) 2D DQF-COSY spectrum. (E)  $^1\text{H}$ - $^{13}\text{C}$ -HMBC spectrum. (F) 2D ROZY spectrum.

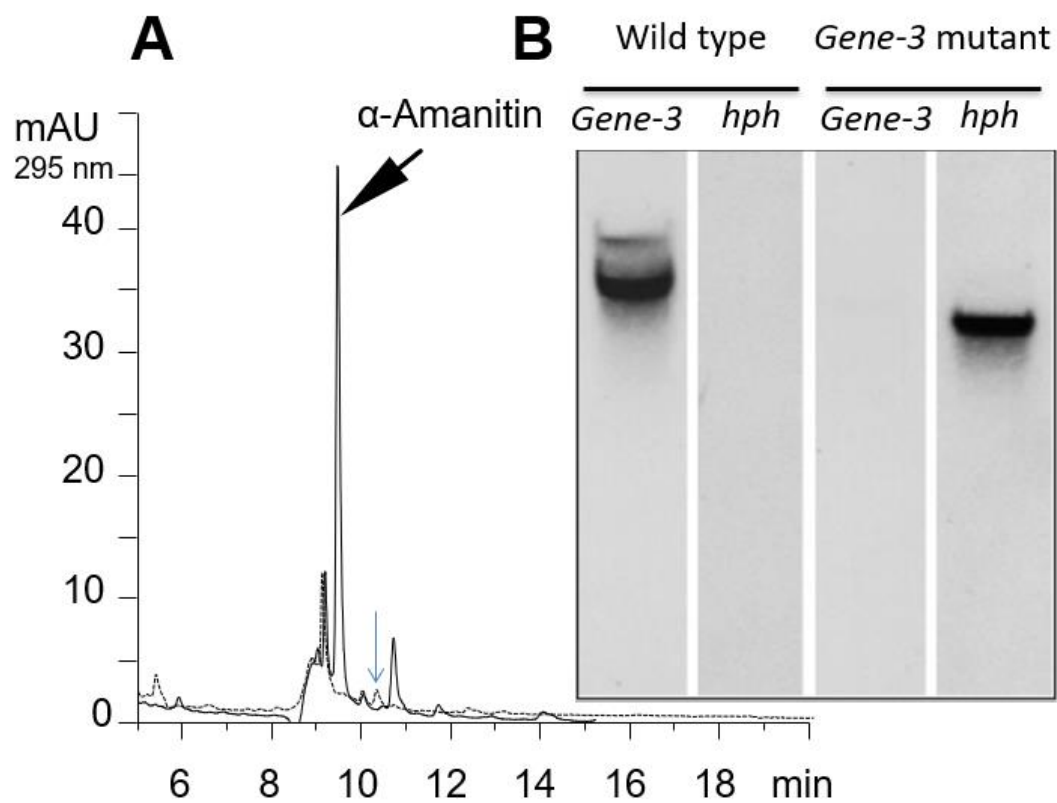

**Fig. S6.** Deletion of *Gene-3* in *Galerina marginata* results in loss of  $\alpha$ -amanitin production and accumulation of a new product. (A) LC-MS analysis. Solid line, OD<sub>295</sub> for wild type; dashed line, OD<sub>295</sub> for *Gene-3* mutant. (B) DNA blot analysis for wild type and mutant; *hph* for hygromycin B marker.

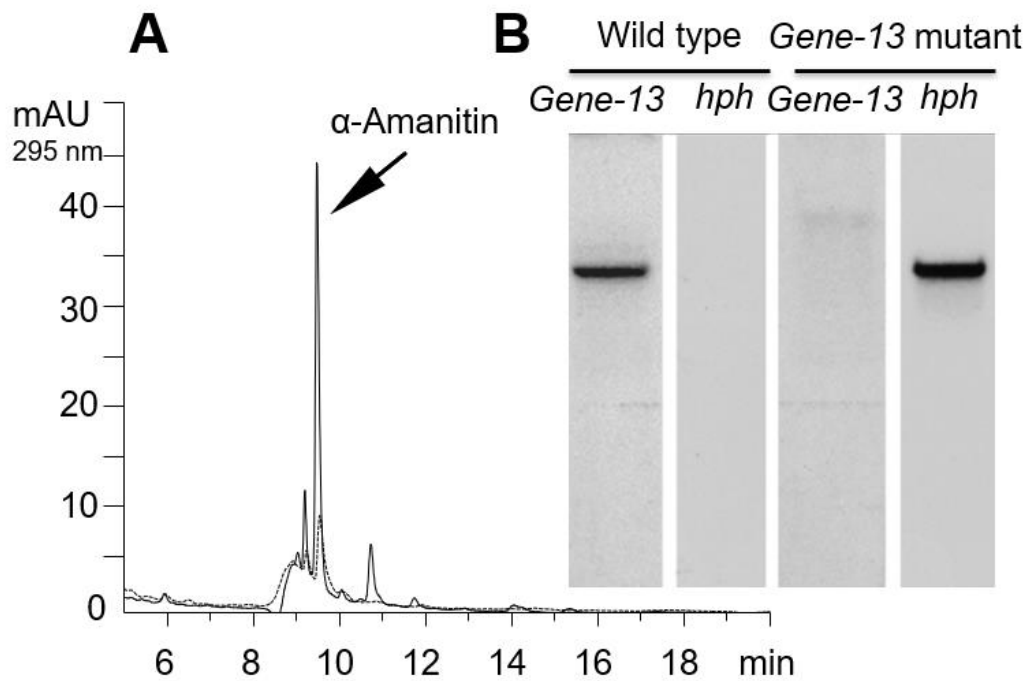

**Fig. S7.** Deletion of *Gene-13* in *Galerina marginata* results in drastic reduction of  $\alpha$ -amanitin. (A) LC-MS analysis. Solid line, OD<sub>295</sub> for wild type; dashed line, OD<sub>295</sub> for *Gene-13* mutant. (B) DNA blot analysis for wild type and mutant; *hph* for hygromycin B marker.



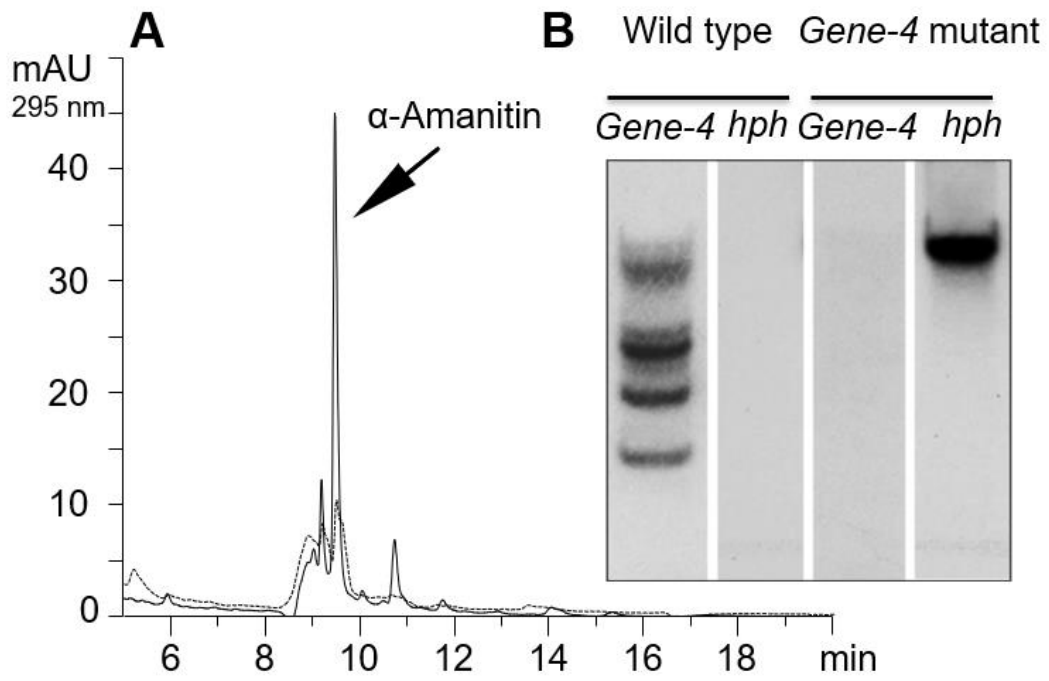

**Fig. S8.** Deletion of *Gene-4* in *Galerina marginata* results in drastic reduction of  $\alpha$ -amanitin. (A) LC-MS analysis. Solid line, OD<sub>295</sub> for wild type; dashed line, OD<sub>295</sub> for *CYP450-29* mutant. (B) DNA blot analysis for wild type and mutant; *hph* for hygromycin B marker.

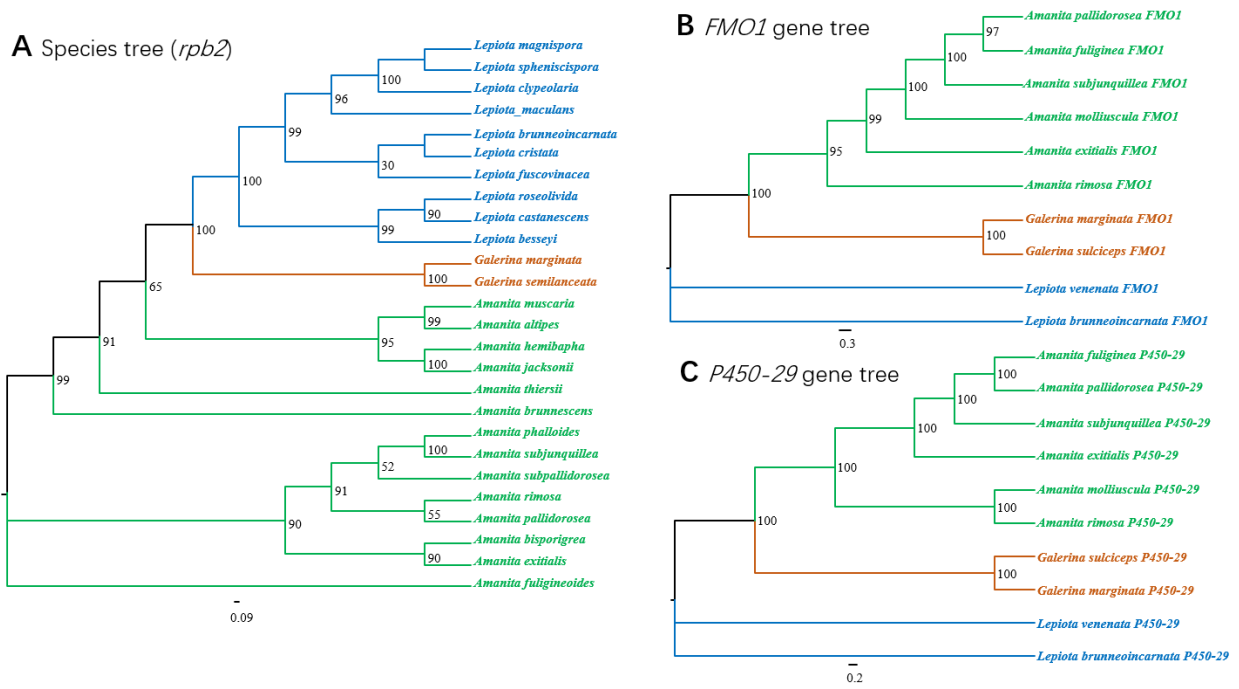

**Fig. S9.** Comparison of *FMO1* and *P450-29* with species tree (*rpb2*). *Amanita* was indicated in green, *Lepiota* in blue, and *Galerina* in brown (Maximum likelihood bootstraps over 50% are shown on the branches)

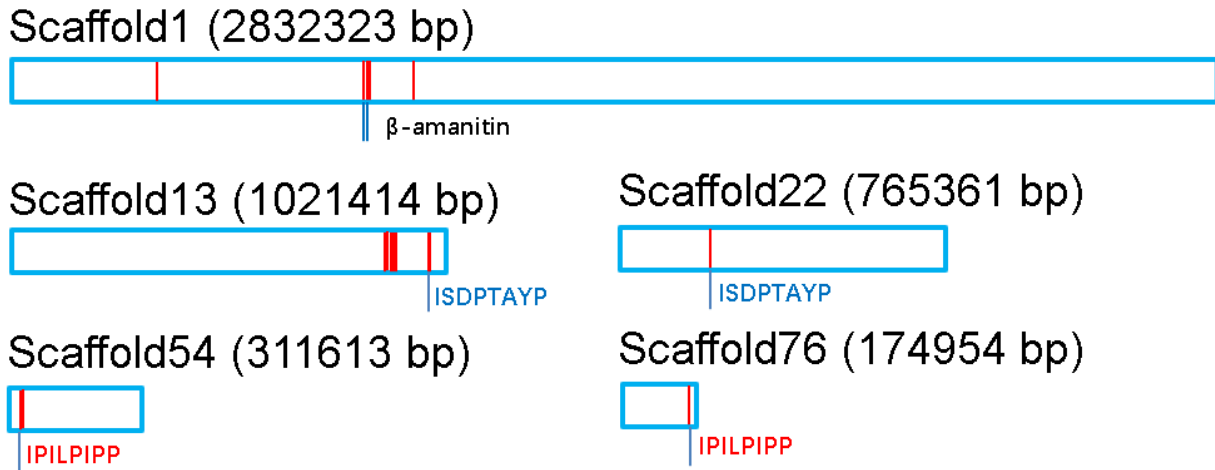

**Fig. S10.** Distribution of *MSDIN* genes present in two copies in the genome of *Amanita subjunquillea*. Blue lines under the scaffolds (blue boxes) represent the locations of the *MSDIN*s (red lines) in two copies. Amino acid sequences of the cyclic peptides were indicated on the right of the blue lines, with the same color for the same peptide.  $\beta$ -Amanitin-encoding *MSDIN* has two tightly-linked copies.

Contig 1 (1811650 bp)

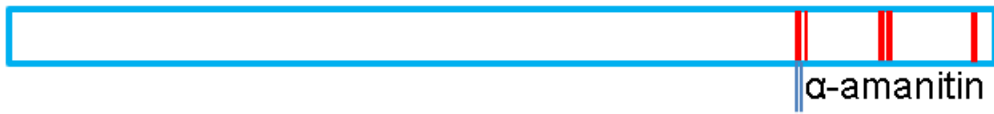

Contig 8 (1101286 bp)

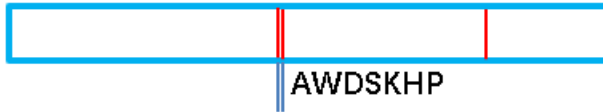

Contig 31 (543168 bp)

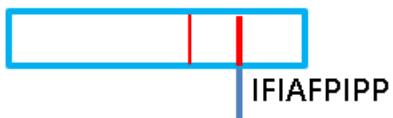

Contig 70 (170775 bp)

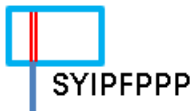

**Fig. S11.** The distribution of *MSDIN* genes present in in two copies in the genome of *Amanita rimosa*. Blue lines under the contigs (blue boxes) represent the locations of the *MSDIN*s (red lines) in two copies. Amino acid sequences of the cyclic peptides were indicated on the right of the blue lines. All denoted *MSDIN* genes in this figure have two tightly linked copies.

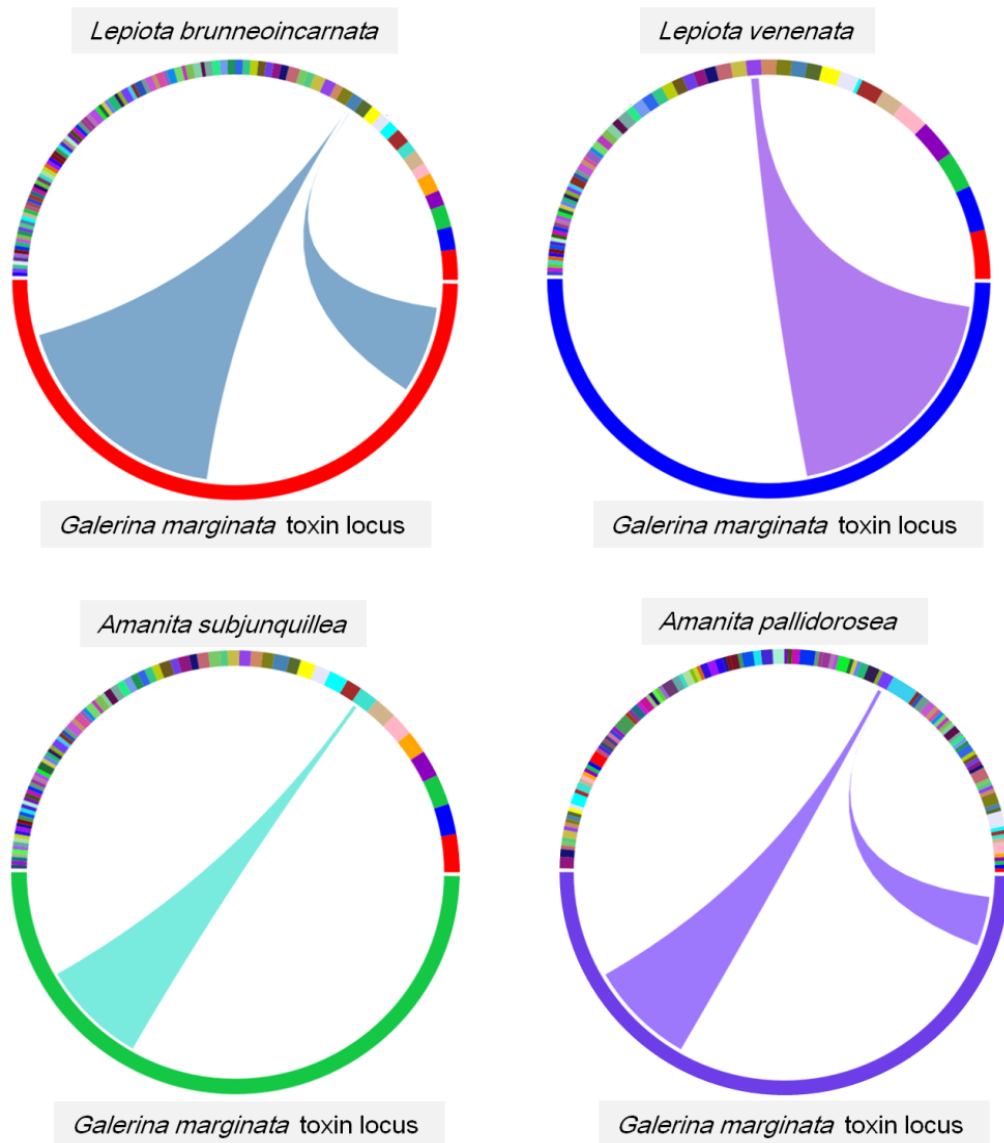

**Fig. S12.** Synteny analyses of the amanitin biosynthetic locus in *Galerina marginata* vs. those of *Amanita* and *Lepiota* species. The upper row shows two *Lepiota* loci vs the *Galerina* locus, while the bottom row represents two *Amanita* loci vs. the *Galerina* one. The *G. marginata* biosynthetic locus is placed as the lower half circles for all comparisons, and *Amanita* and *Lepiota* genomes as the upper half circles. Syntenic regions containing amanitin biosynthetic genes are connected by colored ribbons.

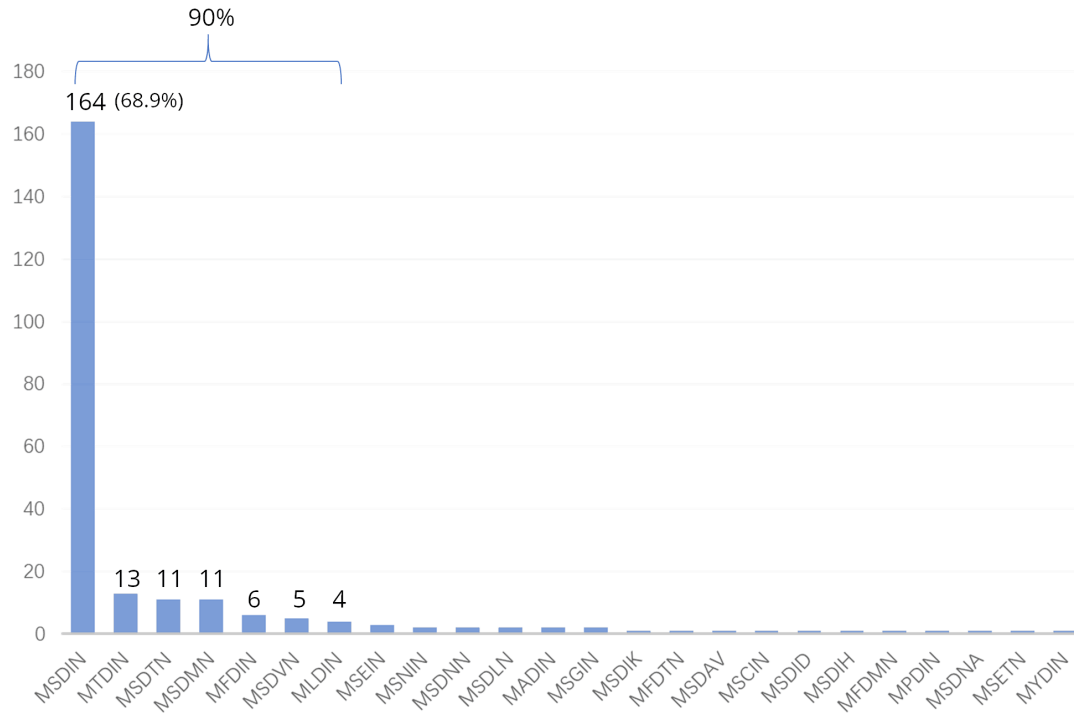

**Fig. S13.** N-terminals of *MSDIN* genes in 8 *Amanita* species. The species include *A. molliuscula*, *A. exitialis*, *A. phalloides*, *A. subjunquillea*, *A. fuliginea*, *A. rimosa*, *A. pallidorosea*, and *A. bisporigera*

Gene structure of *AbP450-1* from *A. bisporigera*

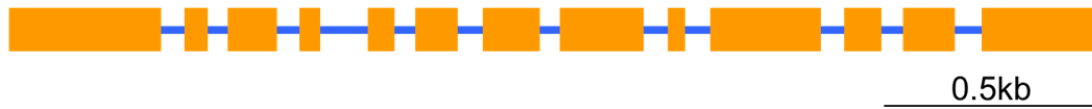

Gene structure of *AbP450-2* from *A. bisporigera*

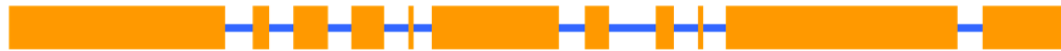

Gene structure of *AbP450-3* from *A. bisporigera*

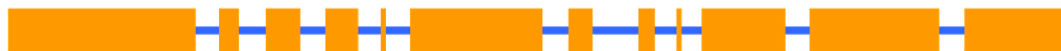

>AbP450-1 deduced amino acid sequence

```
MVDLHAISYSALVTFRLIFQFLKLSAAALTIYGLYRVTRVIYVELTSPIRHLPGPANANIFLGNLQQLWTDITYH
WHSQYGP MIRLNGFLGLSHLYVTD PQALNHILTNGYVYTKPSFTRRQIGKLWGPGLPFVEGDQHKKQRKI
LNPAFGPVRIREFTDCFVKKSKRLQDSWATECSKQGGTCRLDIMVGLGKVVMDIISSTGFRYELDSLDR
SDFSRVGYNFISIEPDSLATPKIHPTSMVHTCIPVETQLDDIKQTLRITSRLLNESKGSVRTNNDNSGSRD
LLSLLVRTNMSPDVPEHRRLSDDDEVKAQVISFVIAGRESPINVMAWALFSLAKKPEIQAKLRRELLTVDTC
QPTTDQLNALS YLDMVIRETLRLYPSSKANSRVCAKDDILPLAKPITDRRG NLFSSISIKRGQVVIIPISAIHK
DKSIWGEDALDFRPERWECLPEGVNTIPGVVSHLLSFWGGPRSCIGFRFAIAEMKALLFTLVRALFDLA
VPAEQISVESGLSNRPILTTNPGRYQLPLLIKPYKARS
```

>AbP450-2 deduced amino acid sequence

```
MLNLNFNGLWPDVAEYFKGNSIRIVTSVFTLLVVISIYRRRRGIRTPRLQGPRSGSFIFGNTKEIFPSANLSV
VYRDWERMYGPPVYEIPTGIGSSHVALSDPKALTHIYSKDTTTYCRLAGTTALTRKVF GDVVSISEGETH KR
LRRGLSSPLSVSAIRNLT PVCLDSAYQLKAAWDSCSPSSERSNNPVIIDVVKWMNSVTLDTIGKAILSHDF
GTLRGRTSLMMAAFDSIHTVKPSPFIRLIHFLSPIFYALFKVTLMSVREEKLAQSV AHLNRLTTNRLNKAHK
EPEDTVNGSVL GILVKSENAIPTAVCHSPRSRPRPVSF SWLHMKQQQSPYTWSLIELARRPEVQESLRAE
LSECLAKGERPTYDQLTKDLKYLD AFIAEILRLHAPEMQSIRV RLLHCFILSLHPP ILAGSRRRCGTVTNPI
RIASGATIDSLFLKKGTVVRIPLGGVNMSEALWGPDA GMFDP SRWLDAEGHKKGNKGELAGYGV S
```

>AbP450-3 deduced amino acid sequence

```
MLNLNFSSLWPYVAEYLKVN SMRIIASGISLLVVVISIYRSRRGPRTPRLQGPHMESFILGNARKIFPSANLS
LVYQGLEQTYGPPVYEIASGFGSNHVVLNDPKAL THLFSKDTVTSQPARQKDMGRKLF GDILVLTEGETH
KRIRRVLSSPLSVSAIRNFT PMCLDSAYQLKASWDSCFQLSNNSNRAIVLDAEKWMNCYTMDNIGKAVLS
YDFGNMRGHTCSILADLDAFHAVSPSGLYIRFIVFTREILYNL FKITLPNAKEKQFEELAAHFV LATGFLRE
ALEAPEDSAVHQ SILGVMLKSKNENANVRLSLPEIT AQAGGLVLAGYETTAIAMTWSLIELARRAEIQETLR
AELKECLADGERPTYDQLTKDLKYLD AFISEILRLHPSEMVLTRVAAEDDVIPLTDPIRTASGAMIDSLFVRK
GTVFRIPLGGMNISETLWGPDAATFDPSRWLEVDGHKGRREKVPGYRNLLTFGAGQRLCPGRDLALLE
MKAALVILVLHFSFEFPNGPSTELSWQFGRPKVAGEDGPKVPMLVRRLT
```

**Fig. S14.** Intron/exon structures and deduced amino acid sequences of *AbP450-1*, *AbP450-2* and *AbP450-3* in *Amanita bisporigera*.

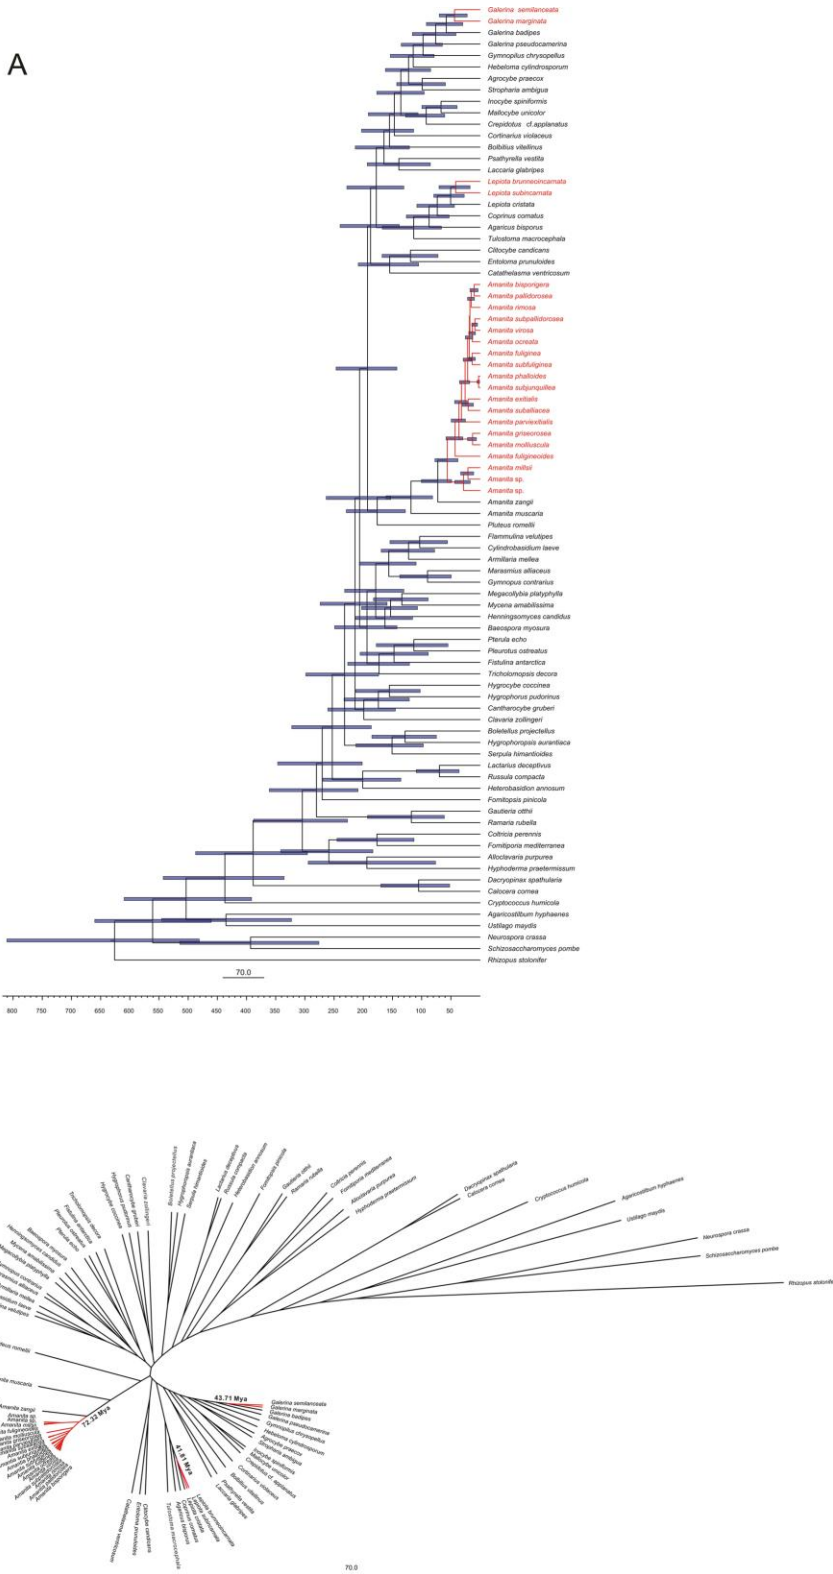

**Fig. S15.** Divergence estimation of the genera *Amanita*, *Galerina* and *Lepiota* using nrLSU, *rpb2* and *tef1- $\alpha$* . (A) The rectangular tree layout of the Maximum clade credibility trees (MCC) trees with blue node bars representing the 95% highest posterior density intervals. (B) The radial tree layout of the MCC trees. The amanita-producing species in *Amanita*, *Galerina* and *Lepiota* are indicated in red. Bar = 70 Mya.



**Table S1A.** Genome features of *Amanita* species.

| Species                         | <i>A. molliuscula</i> | <i>A. fuliginea</i> | <i>A. pallidorosea</i> | <i>A. subjunquillea</i> | <i>A. exitialis</i> | <i>A. rimosa</i> |
|---------------------------------|-----------------------|---------------------|------------------------|-------------------------|---------------------|------------------|
| Size of assembled genome        | 71.17 Mb              | 60.23 Mb            | 57.85 Mb               | 53.20 Mb                | 49.12 Mb            | 45.35 Mb         |
| Number of contigs (scaffolds)   | 155                   | 35                  | 246 (scaffold)         | 119 (scaffold)          | 129                 | 134              |
| N50 (bp)                        | 1053316               | 3461821             | 537462                 | 838703                  | 3025964             | 697900           |
| N90 (bp)                        | 188356                | 1258523             | 145062                 | 240927                  | 296766              | 162745           |
| Maximum length (bp)             | 3180309               | 589859              | 2246582                | 2832323                 | 4698837             | 1811650          |
| GC content of assembled genome  | 46.50%                | 45.91%              | 46.24%                 | 46.57%                  | 46.60%              | 45.99%           |
| Transposable elements of genome | 64.78%                | 39.15%              | 55.60%                 | 53.70%                  | 43.78%              | 50.48 %          |
| BUSCO                           | 87.3%                 | 95.1%               | 90.3%                  | 91.4%                   | 92%                 | 86.5%            |
| CEGMA*                          | 95.16%, 93.55%        | 96.77%, 95.16%      | 96.35%, 93.28%         | 97.89%, 96.12%          | 97.18%, 95.56%      | 97.18%, 95.56%   |
| Number of <i>MSDIN</i> genes    | 21                    | 30                  | 33                     | 24                      | 23                  | 39               |

**Table S1B.** Genome features of *Lepiota* species.

| Species                         | <i>L. venenata</i> | <i>L. brunneoincarnata</i> | <i>L. subincarnata</i> 1 | <i>L. subincarnata</i> 2 |
|---------------------------------|--------------------|----------------------------|--------------------------|--------------------------|
| Size of assembled genome        | 49.26M             | 55.61 Mb                   | 38.40 Mb                 | 37.84 Mb                 |
| Number of contigs               | 88                 | 97                         | 324 (scaffold)           | 576 (scaffold)           |
| N50                             | 1272972bp          | 1225926bp                  | 920212bp                 | 415558bp                 |
| N90                             | 344036bp           | 275636bp                   | 163783bp                 | 52448bp                  |
| Maximum length                  | 3318280bp          | 3973606bp                  | 2859616bp                | 2597781bp                |
| GC content of assembled genome  | 49.02%             | 48.85%                     | 49.76%                   | 49.79%                   |
| Transposable elements of genome | 34.18%             | 34.04 %                    | N/A                      | N/A                      |
| BUSCO                           | 87.3%              | 89.1%                      | 93.1%                    | 93.5%                    |
| CEGMA*                          | 94.32%, 93.44%     | 95.97%, 91.94%             | 93.55%, 95.97%           | 81.85%, 83.47%           |
| Number of <i>MSDIN</i> genes    | 4                  | 3                          | 6                        | 5                        |

**Table S1C.** Genome features of *Galerina* species.

| Species                         | <i>G. marginata</i> JGI | <i>G. marginata</i> | <i>G. sulciiceps</i> |
|---------------------------------|-------------------------|---------------------|----------------------|
| Size of assembled genome        | 59.42 Mb                | 69.36 Mb            | 101.89 Mb            |
| Number of contigs (scaffolds)   | 414                     | 44                  | 137                  |
| N50                             | 1219514 bp              | 2607326 bp          | 1836322 bp           |
| N90                             | 334874 bp               | 745800 bp           | 505162 bp            |
| Maximum length                  | 3629680 bp              | 4516205 bp          | 4131357 bp           |
| GC content of assembled genome  | 47.97%                  | 47.60%              | 47.81%               |
| Transposable elements of genome | N/A                     | 13.97%              | 17.56%               |
| BUSCO                           | 95.2%                   | 89.7%               | 97.9%                |
| CEGMA*                          | N/A                     | 96.37%, 96.37%      | 97.18%, 95.97%       |
| Number of <i>MSDIN</i> genes    | 1 in 2 copies           | 1 in 2 copies       | 1 in 2 copies        |

\*CEGMA: the two percentages are (Complete+Partial)% and Complete%, respectively

**Table S2.** Genes in the vicinity of *GmAMA1* (numbered gene 0) on scaffold\_42 of *Galerina marginata* genome. Predictions were based on JGI annotation, KEGG and/or Pfam motifs and COG/SwissProt/PDB. Proteins for which no reasonable function could be deduced are listed simply as “predicted protein”. N.D. not determined.

| Gene number; position upstream (-) or downstream (+) of <i>GmAMA1-1</i> | JGI gene number and genomic position | Predicted function                                       | Restricted to amanitin-producing species? | Gene deletion phenotype                      |
|-------------------------------------------------------------------------|--------------------------------------|----------------------------------------------------------|-------------------------------------------|----------------------------------------------|
| +10                                                                     | Galma1_257027<br>42:140765-144287    | aminopeptidase                                           | No                                        | N.D.                                         |
| +9                                                                      | Galma1_257029<br>42:144355-148517    | RNA helicase                                             | No                                        | N.D.                                         |
| +8                                                                      | Galma1_1042023<br>42:148306-149401   | Zn finger                                                | No                                        | N.D.                                         |
| +7                                                                      | Galma1_161032<br>42:149378-152593    | Splicing coactivator SRm160/300, subunit SRm300          | No                                        | N.D.                                         |
| +6                                                                      | Galma1_257032<br>42:152634-156484    | Cdc2-related protein kinase                              | No                                        | N.D.                                         |
| +5                                                                      | Galma1_78730<br>42:157417-157974     | NUDIX hydrolase core                                     | N.D.                                      | N.D.                                         |
| +4                                                                      | Galma1_104940<br>42:157739-159538    | Predicted protein                                        | No                                        | N.D.                                         |
| +3                                                                      | Galma1_257038<br>42:159684-160745    | Predicted protein                                        | N.D.                                      | N.D.                                         |
| +2                                                                      | Galma1_78538<br>42:161453-164563     | Prolyl oligopeptidase B (GmPOPB)                         | Yes                                       | No amanitin                                  |
| +1                                                                      | Galma1_104945<br>42:165397-167604    | Flavin monooxygenase                                     | Yes                                       | No amanitin; appearance of modified products |
| 0                                                                       | Galma1_1387421<br>42:167593-168145   | <i>GmAMA1-1</i> : Core propeptide for $\alpha$ -amanitin | Yes                                       | No amanitin                                  |
| -1                                                                      | Galma1_78564<br>42:169158-170505     | Predicted protein                                        | No                                        | No phenotype                                 |
| -2                                                                      | Galma1_129463<br>42:171096-172792    | 26S proteasome subunit P45                               | N.D.                                      | N.D.                                         |
| -3                                                                      | Galma1_78731<br>42:173298-176762     | RNA helicase                                             | Yes                                       | No amanitin                                  |
| -4                                                                      | Galma1_78688<br>42:180479-           | G protein alpha subunit                                  | Yes                                       | No amanitin                                  |

|     |                                                                                        |                                                                            |      |             |
|-----|----------------------------------------------------------------------------------------|----------------------------------------------------------------------------|------|-------------|
|     | 183180                                                                                 |                                                                            |      |             |
| -5  | Galma1_231355<br>42:192672-<br>193619<br>[9.5 kb gap is<br>between this one<br>and -4] | Predicted protein                                                          | No   | N.D.        |
| -6  | Galma1_257051<br>42:194701-<br>197274                                                  | Glycoside hydrolase<br>family 5                                            | N.D. | N.D.        |
| -7  | Galma1_215833<br>42:198847-<br>200755                                                  | Predicted protein                                                          | N.D. | N.D.        |
| -8  | Galma1_78691<br>42:201312-<br>204681                                                   | HAT repeat protein                                                         | No   | N.D.        |
| -9  | Galma1_231359<br>42:207145-<br>209370                                                  | Predicted protein                                                          | N.D. | N.D.        |
| -10 | Galma1_146353<br>42:209732-<br>210893                                                  | Predicted protein                                                          | N.D. | N.D.        |
| -11 | Galma1_215837<br>42:211640-<br>213731                                                  | Chaperonin Cpn60                                                           | No   | N.D.        |
| -12 | Galma1_257062<br>42:215343-<br>216248                                                  | Predicted protein                                                          | No   | N.D.        |
| -13 | Galma1_1043998<br>42:219282-<br>221843                                                 | DUF2046                                                                    | Yes  | No amanitin |
| -14 | Galma1_1043988<br>42:221415-<br>222437                                                 | Predicted protein                                                          | N.D. | N.D.        |
| -15 | Galma1_231366<br>42:222497-<br>225560                                                  | Predicted protein                                                          | No   | N.D.        |
| -16 | Galma1_231368<br>42:227121-<br>229532                                                  | NUDIX hydrolase                                                            | N.D. | N.D.        |
| -17 | Galma1_257091<br>42:231164-<br>232545                                                  | Predicted protein                                                          | No   | N.D.        |
| -18 | Galma1_1044687<br>42:233923-<br>235734                                                 | Protein kinase-like                                                        | N.D. | N.D.        |
| -19 | Galma1_257096<br>42:236124-<br>238040                                                  | Protein kinase-like                                                        | N.D. | N.D.        |
| -20 | Galma1_146362<br>42:238703-<br>240154                                                  | Protein kinase-like                                                        | N.D. | N.D.        |
| -21 | Galma1_257099<br>42:240649-<br>243248                                                  | Multidrug resistance<br>efflux transporter (high<br>expression); pfam05653 | No   | N.D.        |

|     |                                        |                                                       |      |                                                   |
|-----|----------------------------------------|-------------------------------------------------------|------|---------------------------------------------------|
| -22 | Galma1_1044278<br>42:243547-<br>244070 | Predicted protein                                     | N.D. | N.D.                                              |
| -23 | Galma1_1044290<br>42:244042-<br>245433 | Predicted protein                                     | N.D. | N.D.                                              |
| -24 | Galma1_1354407<br>42:247479-<br>252016 | Kinesin light chain                                   | No   | N.D.                                              |
| -25 | Galma1_257105<br>42:254825-<br>256261  | ankyrin-containing<br>protein                         | N.D. | N.D.                                              |
| -26 | Galma1_231377<br>42:256478-<br>258563  | CYP450 family 512                                     | Yes  | Unsuccessful                                      |
| -27 | Galma1_257111<br>42:258816-<br>260766  | Ankyrin-containing<br>protein                         | N.D. | N.D.                                              |
| -28 | Galma1_78764<br>42:261689-<br>263647   | CYP450 family 512                                     | Yes  | Unsuccessful                                      |
| -29 | Galma1_1044748<br>42:264395-<br>266860 | CYP450 family 512                                     | Yes  | No amanitin;<br>appearance of<br>modified product |
| -30 | Galma1_215850<br>42:267138-<br>268828  | Trypsin-like peptidase                                | N.D. | N.D.                                              |
| -31 | Galma1_215851<br>42:269431-<br>271514  | CYP450 family 512                                     | Yes  | Unsuccessful                                      |
| -32 | Galma1_257133<br>42:272517-<br>273556  | 40S ribosomal protein<br>S26 (high expression)        | N.D. | N.D.                                              |
| -33 | Galma1_257135<br>42:273729-<br>275057  | $\beta$ -1,6-N-<br>acetylglucosaminyl-<br>transferase | N.D. | N.D.                                              |
| -34 | Galma1_257137<br>42:276090-<br>277950  | Zn finger                                             | N.D. | N.D.                                              |
| -35 | Galma1_78570<br>42:279908-<br>282443   | Major facilitator<br>superfamily                      | N.D. | N.D.                                              |
| -36 | Galma1_129535<br>42:283203-<br>287081  | Histone transcription<br>regulator Tup1-like          | N.D. | N.D.                                              |
| -37 | Galma1_257141<br>42:287317-<br>289072  | predicted protein                                     | N.D. | N.D.                                              |
| -38 | Galma1_272650<br>42:289228-<br>292537  | Zn finger                                             | N.D. | N.D.                                              |

**Table S3.** Accession numbers of the sequences used in divergence time estimation for *Amanita*, *Galerina* and *Lepiota*.

| Taxon                           | Voucher       | Accession numbers |             |                                 |
|---------------------------------|---------------|-------------------|-------------|---------------------------------|
|                                 |               | nrLSU             | <i>rpb2</i> | <i>tef1-<math>\alpha</math></i> |
| <i>Agaricostilbum hyphaenes</i> | CBS7811       | AY634278          | AY780933    | AY879114                        |
| <i>Agaricus bisporus</i>        | TUB 011586    | DQ071710          | FJ623644    | N/A                             |
| <i>Agrocybe praecox</i>         | AFTOL-ID 728  | AY646101          | DQ385876    | N/A                             |
| <i>Alloclavaria purpurea</i>    | AFTOL-ID 1736 | DQ457657          | N/A         | N/A                             |
| <i>Amanita bisporigera</i>      | RET 377-9     | KJ466434          | N/A         | KJ481936                        |
| <i>Amanita exitialis</i>        | HKAS75774     | JX998052          | KJ466591    | JX998001                        |
| <i>Amanita fuliginea</i>        | HKAS75780     | JX998048          | KJ466595    | JX997995                        |
| <i>Amanita fuligineoides</i>    | HKAS83694     | MH486553          | MH486020    | MH508824                        |
| <i>Amanita griseorosea</i>      | HKAS89004     | KU168387          | KU168388    | KU168386                        |
| <i>Amanita molliuscula</i>      | HKAS77324     | KJ466472          | KJ466639    | KJ481974                        |
| <i>Amanita muscaria</i>         | GAL2810       | DQ060884          | N/A         | EU071872                        |
| <i>Amanita ocreata</i>          | HKAS79686     | KJ466442          | KJ466607    | KJ481947                        |
| <i>Amanita pallidorosea</i>     | HKAS61937     | KJ466443          | KJ466609    | KJ481949                        |
| <i>Amanita parviexitialis</i>   | HKAS79049     | KT971342          | KT971345    | KT971346                        |
| <i>Amanita phalloides</i>       | HKAS75773     | JX998060          | KJ466612    | JX998000                        |
| <i>Amanita rimosa</i>           | HKAS75777     | JX998044          | KJ466615    | JX998005                        |
| <i>Amanita</i> sp.              | HKAS77322     | KJ466457          | KJ466643    | KJ481978                        |
| <i>Amanita</i> sp.              | HKAS75150     | KJ466477          | KJ466641    | KJ481976                        |
| <i>Amanita</i> sp.              | HKAS77323     | KJ466478          | KJ466642    | KJ481977                        |
| <i>Amanita suballiacea</i>      | RET 490-1     | KJ466485          | KJ466601    | KJ481941                        |
| <i>Amanita subfuliginea</i>     | HKAS77326     | KJ466467          | KJ466636    | KJ481971                        |
| <i>Amanita subjunquillea</i>    | HKAS75770     | JX998062          | KJ466653    | JX997999                        |
| <i>Amanita subpallidorosea</i>  | HKAS77350     | KJ466462          | KJ466631    | KJ481966                        |
| <i>Amanita virosa</i>           | HKAS56694     | JX998058          | KJ466664    | JX998007                        |
| <i>Amanita zangii</i>           | GDGM29241     | KJ466499          | KJ466668    | KJ482000                        |
| <i>Armillaria mellea</i>        | AFTOL-ID 449  | AY700194          | AY780938    | AY881023                        |
| <i>Baeospora myosura</i>        | AFTOL-ID 1799 | DQ457648          | DQ470827    | GU187762                        |
| <i>Bolbitius vitellinus</i>     | AFTOL-ID 730  | AY691807          | DQ385878    | N/A                             |
| <i>Boletellus projectellus</i>  | MB03-118      | AY684158          | AY787218    | AY879116                        |

|                                  |                           |          |          |          |
|----------------------------------|---------------------------|----------|----------|----------|
| <i>Calocera cornea</i>           | GEL5359                   | AY701526 | AY536286 | AY881019 |
| <i>Cantharocybe gruberi</i>      | AFTOL-ID 1017             | DQ234540 | DQ385879 | DQ059045 |
| <i>Catathelasma ventricosum</i>  | AFTOL-ID 1488             | DQ089012 | DQ470830 | N/A      |
| <i>Clavaria zollingeri</i>       | TENN58652                 | AY639882 | AY780940 | AY881024 |
| <i>Clitocybe candicans</i>       | AFTOL-ID 541              | AY645055 | DQ385881 | DQ408149 |
| <i>Coltricia perennis</i>        | DSH93-198                 | AF287854 | AY218526 | AY885147 |
| <i>Coprinus comatus</i>          | AFTOL-ID 626              | AY635772 | AY780934 | N/A      |
| <i>Cortinarius violaceus</i>     | AFTOL-ID 814              | DQ457662 | DQ470835 | N/A      |
| <i>Crepidotus cf. applanatus</i> | AFTOL-ID 817              | AY380406 | AY333311 | DQ028581 |
| <i>Cryptococcus humicola</i>     | PYCC 3387T                | DQ645514 | DQ645517 | DQ645519 |
| <i>Cylindrobasidium laeve</i>    | AFTOL-ID 453              | DQ234541 | AY536283 | DQ408151 |
| <i>Dacryopinax spathularia</i>   | GEL5052                   | AY701525 | AY786054 | AY881020 |
| <i>Entoloma prunuloides</i>      | AFTOL-ID 523              | AY700180 | DQ385883 | DQ457633 |
| <i>Fistulina antarctica</i>      | CBS 701.85                | AY293181 | N/A      | N/A      |
| <i>Flammulina velutipes</i>      | AFTOL-ID 558              | AY639883 | AY786055 | AY883423 |
| <i>Fomitiporia mediterranea</i>  | Michael Fischer 3/22      | AY684157 | AY803748 | AY885149 |
| <i>Fomitopsis pinicola</i>       | MB03-036                  | AY684164 | AY786056 | AY885152 |
| <i>Galerina badipes</i>          | GLM 45922                 | AY207201 | N/A      | N/A      |
| <i>Galerina marginata</i>        | N/A                       | JGI      | JGI      | JGI      |
| <i>Galerina pseudocamerina</i>   | O 73481<br>PBM 1398 (WTU) | AJ871519 | N/A      | N/A      |
| <i>Galerina semilanceata</i>     | Washington                | AY038309 | AY337357 | N/A      |
| <i>Gautieria otthii</i>          | REG 636                   | AF393058 | AY218486 | AY883434 |
| <i>Gymnopilus chrysopellus</i>   | PR-1187                   | JGI      | JGI      | JGI      |
| <i>Gymnopus contrarius</i>       | AFTOL-ID 1758             | DQ457670 | GU187700 | DQ472716 |
| <i>Hebeloma cylindrosporum</i>   | h7                        | JGI      | JGI      | JGI      |
| <i>Henningsomyces candidus</i>   | AFTOL-ID 468              | AY571008 | AY883424 | AY218513 |
| <i>Heterobasidion annosum</i>    | N/A                       | JGI      | JGI      | JGI      |
| <i>Hygrocybe conica</i>          | PBM 918                   | AY684167 | AY803747 | AY883425 |
| <i>Hygrophoropsis aurantiaca</i> | MB03-127                  | AY684156 | AY786059 | AY883427 |
| <i>Hygrophorus pudorinus</i>     | AFTOL-ID 1723             | DQ457678 | DQ472725 | GU187710 |
| <i>Inocybe spiniformis</i>       | PERTH: 08363277           | KP171063 | N/A      | N/A      |
| <i>Laccaria glabripes</i>        | GMM7521                   | KU685849 | KU685991 | KU686117 |
| <i>Lactarius deceptivus</i>      | PBM2462                   | AY631899 | AY803749 | AY885158 |

|                                  |                |          |              |              |
|----------------------------------|----------------|----------|--------------|--------------|
| <i>Lepiota brunneoincarnata</i>  | HMAS 63488     | EU416303 | N/A          | N/A          |
| <i>Lepiota cristata</i>          | HKAS 45053     | JN940283 | JN993699     | JN993699     |
| <i>Lepiota subincarnata</i>      | N/A            | Genome   | Genome       | Genome       |
|                                  | PBM 1481 (WTU) |          |              |              |
| <i>Mallocybe unicolor</i>        | Missouri       | AY380403 | AY337409     | N/A          |
| <i>Marasmius alliaceus</i>       | TENN55620      | AY635776 | AY786060     | AY883431     |
| <i>Megacollybia platyphylla</i>  | AFTOL-ID 560   | AY702016 | DQ385887     | DQ435786     |
| <i>Mycena amabilissima</i>       | AFTOL-ID 1686  | DQ457691 | DQ474121     | GU187727     |
| <i>Neurospora crassa</i>         | MUCL 19026     | AF286411 | XM_952013    | XM_959775    |
| <i>Pleurotus ostreatus</i>       | AFTOL-ID 564   | AY645052 | AY786062     | AY883432     |
| <i>Pluteus romellii</i>          | ECV 3201       | AY634279 | AY786063     | AY883433     |
| <i>Psathyrella vestita</i>       | SZMC-NL-2346   | FN430695 | N/A          | FN430696     |
| <i>Pterula echo</i>              | AFTOL-ID 711   | AY629315 | GU187805     | N/A          |
| <i>Ramaria rubella</i>           | PBM 2408       | AY645057 | AY786064     | AY883435     |
| <i>Rhizopus stolonifer</i>       | DAOM225708     | DQ273817 | AFTOL        | AFTOL        |
| <i>Russula compacta</i>          | BPL669         | JGI      | JGI          | JGI          |
| <i>Schizosaccharomyces pombe</i> | Strain972      | Z19136   | NM_001018498 | NM_001022750 |
| <i>Serpula himantoides</i>       | AFTOL-ID 1387  | AF518648 | AY218517     | DQ059046     |
| <i>Stropharia ambigua</i>        | AFTOL-ID 726   | AY646102 | DQ484054     | N/A          |
| <i>Tricholomopsis decora</i>     | AFTOL-ID 537   | AY691888 | DQ408112     | DQ029195     |
| <i>Tulostoma macrocephalum</i>   | Long 10111 FH  | AF518663 | N/A          | N/A          |
| <i>Ustilago maydis</i>           | PBM2469        | AF453938 | AY485636     | AY885160     |



**Table S4.** 2D-NMR correlations observed in new product from the *CYP450-29* mutant ( $\theta$ -amanitin).

|    | Residue | Nucleus | Atom         | ppm    | TOCSY       | COSY        | HSQC  | HMBC           | ROESY          |
|----|---------|---------|--------------|--------|-------------|-------------|-------|----------------|----------------|
| 1  | Ile1    | H       | HN           | 7.86   | 1,2,3,4,5,6 | 1,2         | x     | 83             | 2,4,6,13,74    |
| 2  | Ile1    | H       | H $\alpha$   | 4.20   | 1,2,3,4,5,6 | 1,2,3       | 7     | 8,9,10,12      | 1,4,6,13       |
| 3  | Ile1    | H       | H $\beta$    | 1.99   | 1,2,3,4,5,6 | 2,3,5       | 8     | 7,9,10,11,12   | x              |
| 4  | Ile1    | H       | H $\gamma$   | 3.69   | 1,2,3,4,5,6 | 4,6         | 9     | 7,8,10,11      | 1,2,6,74       |
| 5  | Ile1    | H       | $\gamma$ CH3 | 0.82   | 1,2,3,4,5   | 3,5         | 10    | 7,8,9          | x              |
| 6  | Ile1    | H       | $\delta$ CH3 | 0.92   | 2,3,4,6     | 4,6         | 11    | 8,9            | 1,2,4          |
| 7  | Ile1    | C       | C $\alpha$   | 55.87  | x           | x           | 2     | 3,4,5          | x              |
| 8  | Ile1    | C       | C $\beta$    | 40.97  | x           | x           | 3     | 2,4,5,6        | x              |
| 9  | Ile1    | C       | C $\gamma$   | 65.41  | x           | x           | 4     | 2,3,5,6        | x              |
| 10 | Ile1    | C       | C $\gamma'$  | 10.73  | x           | x           | 5     | 2,3,4          | x              |
| 11 | Ile1    | C       | C $\delta$   | 17.77  | x           | x           | 6     | 3,4            | x              |
| 12 | Ile1    | C       | CO           | 170.58 | x           | x           | x     | 2,3,13,14      | x              |
| 13 | Trp2    | H       | HN           | 8.04   | 13,14,15,16 | 13,14       | x     | 12,21,22       | 1,2,14,15,16   |
| 14 | Trp2    | H       | H $\alpha$   | 4.81   | 13,14,15,16 | 13,14,15,16 | 21    | 12,22,31       | 13,15,18,32    |
| 15 | Trp2    | H       | H $\beta$ 1  | 3.26   | 13,14,15,16 | 14,15,16    | 22    | 21,23,24,25    | 13,14,16,18,67 |
| 16 | Trp2    | H       | H $\beta$ 2  | 2.68   | 13,14,15,16 | 14,15,16    | 22    | 21,23,24,25    | 13,15,32,62,67 |
| 17 | Trp2    | H       | 1(N)H        | 11.27  | x           | x           | x     | x              | x              |
| 18 | Trp2    | H       | 4H           | 7.45   | 18,19,20    | 18,19       | 26    | 24,25,28,29,30 | 14,15,19       |
| 19 | Trp2    | H       | 5H           | 6.58   | 18,19,20    | 18,19       | 27    | 25,28,29       | 18             |
| 20 | Trp2    | H       | 7H           | 6.74   | 18,19,20    | x           | 29    | 25,27,28,30    | x              |
| 21 | Trp2    | C       | C $\alpha$   | 53.03  | x           | x           | 14    | 13,15,16       | x              |
| 22 | Trp2    | C       | C $\beta$    | 28.04  | x           | x           | 15,16 | 13,14          | x              |
| 23 | Trp2    | C       | C2           | 129.86 | x           | x           | x     | 15,16          | x              |
| 24 | Trp2    | C       | C3           | 111.28 | x           | x           | x     | 15,16,18       | x              |
| 25 | Trp2    | C       | C3a          | 120.66 | x           | x           | x     | 15,16,18,19,20 | x              |
| 26 | Trp2    | C       | C4           | 122.20 | x           | x           | 18    | x              | x              |
| 27 | Trp2    | C       | C5           | 110.41 | x           | x           | 19    | 20             | x              |
| 28 | Trp2    | C       | C6           | 154.66 | x           | x           | x     | 18,19,20       | x              |
| 29 | Trp2    | C       | C7           | 96.45  | x           | x           | 20    | 18,19          | x              |
| 30 | Trp2    | C       | C7a          | 138.76 | x           | x           | x     | 18,20          | x              |

|    |      |   |       |        |                   |                |       |                   |                      |
|----|------|---|-------|--------|-------------------|----------------|-------|-------------------|----------------------|
| 31 | Trp2 | C | CO    | 170.34 | x                 | x              | x     | 14,32             | x                    |
| 32 | Gly3 | H | HN    | 7.88   | 32,33,34          | 32,33          | x     | 31                | 14,16,33,34,57,62    |
| 33 | Gly3 | H | Ha1   | 4.37   | 32,33,34          | 32,33,34       | 35    | 36                | 32,34,37             |
| 34 | Gly3 | H | Ha2   | 3.27   | 32,33,34          | 33,34          | 35    | 36                | 32,33,37             |
| 35 | Gly3 | C | Ca    | 40.82  | x                 | x              | 33,34 | x                 | x                    |
| 36 | Gly3 | C | CO    | 170.35 | x                 | x              | x     | 33,34,37          | x                    |
| 37 | Ile4 | H | HN    | 8.45   | 37,38,39,41,42    | 37,38          | x     | 36,45             | 33,34,39,41,42       |
| 38 | Ile4 | H | Ha    | 3.60   | 37,38,39,41,42,43 | 37,38,39       | 44    | 45,47,49          | x                    |
| 39 | Ile4 | H | Hβ    | 1.55   | 37,38,39,41,42,43 | 38,39,40,41,42 | 45    | 44,46,47,49       | 37                   |
| 40 | Ile4 | H | Hγ1   | 1.53   | x                 | 39,40,41,43    | 46    | 44,45,47,48       | 37,50                |
| 41 | Ile4 | H | Hγ2   | 1.09   | 38,39,41,42,43    | 39,40,41,43    | 46    | 44,45,47,48       | 37                   |
| 42 | Ile4 | H | γ'CH3 | 0.80   | 37,38,39,41,42    | 39,42          | 47    | 44,45,46          | 37,50,51             |
| 43 | Ile4 | H | δCH3  | 0.82   | 39,41,43          | 40,41,43       | 48    | 45,46             | x                    |
| 44 | Ile4 | C | Ca    | 58.94  | x                 | x              | 38    | 39,40,41,42       | x                    |
| 45 | Ile4 | C | Cβ    | 34.52  | x                 | x              | 39    | 37,38,40,41,42,43 | x                    |
| 46 | Ile4 | C | Cγ    | 24.97  | x                 | x              | 40,41 | 39,42,43          | x                    |
| 47 | Ile4 | C | Cγ'   | 14.52  | x                 | x              | 42    | 38,39,40,41       | x                    |
| 48 | Ile4 | C | Cδ    | 10.73  | x                 | x              | 43    | 40,41             | x                    |
| 49 | Ile4 | C | CO    | 171.50 | x                 | x              | x     | 38,39,50,51,52    | x                    |
| 50 | Gly5 | H | HN    | 8.79   | 50,51,52          | 50,51,52       | x     | 49,53             | 38,40,41,42,51,52,55 |
| 51 | Gly5 | H | Ha1   | 3.87   | 50,51,52          | 50,51,52       | 53    | 49,54             | 42,50,52,55          |
| 52 | Gly5 | H | Ha2   | 3.45   | 50,51,52          | 50,51,52       | 53    | 49,54             | 50,51,55             |
| 53 | Gly5 | C | Ca    | 42.17  | x                 | x              | 51,52 | 50                | x                    |
| 54 | Gly5 | C | CO    | 168.10 | x                 | x              | x     | 51,52,55          | x                    |
| 55 | Cys6 | H | HN    | 8.31   | 55,56,57,58       | 55,56          | x     | 54                | 50,51,52,56,57,58,63 |
| 56 | Cys6 | H | Ha    | 4.94   | 55,56,57,58       | 55,56,57       | 59    | 60,61             | 55,58,62             |
| 57 | Cys6 | H | Hβ1   | 3.06   | 55,56,57,58       | 56,57,58       | 60    | 59,61             | 16,32,55,58,62       |
| 58 | Cys6 | H | Hβ2   | 2.91   | 55,56,57,58       | 56,57,58       | 60    | 59,61             | 55,56,57             |
| 59 | Cys6 | C | Ca    | 49.92  | x                 | x              | 56    | 57,58             | x                    |
| 60 | Cys6 | C | Cβ    | 58.80  | x                 | x              | 57,58 | 56                | x                    |
| 61 | Cys6 | C | CO    | 167.14 | x                 | x              | x     | 56,57,58,62       | x                    |
| 62 | Asn7 | H | HN    | 8.49   | 62,63,64,65       | 62,63          | x     | 61,71             | 16,32,56,57,63       |

|    |      |   |                 |        |                      |             |       |                |               |
|----|------|---|-----------------|--------|----------------------|-------------|-------|----------------|---------------|
| 63 | Asn7 | H | H $\alpha$      | 4.77   | 62,63,64,65          | 62,63,64,65 | 68    | 70             | 62,64,65,77   |
| 64 | Asn7 | H | H $\beta$ 1     | 3.48   | 63,64,65             | 63,64,65    | 69    | 68,70,71       | 62,63,65,66   |
| 65 | Asn7 | H | H $\beta$ 2     | 3.01   | 63,64,65             | 63,64,65    | 69    | 68,70          | 63,64,77      |
| 66 | Asn7 | H | $\delta$ NH2(1) | 8.50   | 66,67                | x           | x     | 70             | 64,67         |
| 67 | Asn7 | H | $\delta$ NH2(2) | 7.70   | 66,67                | x           | x     | 70             | 15,16,66      |
| 68 | Asn7 | C | C $\alpha$      | 50.65  | x                    | x           | 63    | 64,65          | x             |
| 69 | Asn7 | C | C $\beta$       | 33.05  | x                    | x           | 64,65 | x              | x             |
| 70 | Asn7 | C | $\gamma$ CO     | 173.09 | x                    | x           | x     | 63,64,65,66,67 | x             |
| 71 | Asn7 | C | CO              | 170.01 | x                    | x           | x     | 62,64          | x             |
| 72 | Pro8 | H | H $\alpha$      | 4.15   | 72,73,74,75,76,77,78 | 72,73,74    | 79    | 80,83          | 1,63,73,76,74 |
| 73 | Pro8 | H | H $\beta$ 1     | 2.31   | 72,73,74,75,76,77,78 | 72,73,74    | 80    | 81,82          | 72,74,76      |
| 74 | Pro8 | H | H $\beta$ 2     | 1.64   | 72,73,74,75,76,77,78 | 72,73,74,76 | 80    | 79,81,83       | 1,4,72,73,75  |
| 75 | Pro8 | H | H $\gamma$ 1    | 1.98   | 72,73,74,75,76,77,78 | x           | 81    | 79             | x             |
| 76 | Pro8 | H | H $\gamma$ 2    | 1.81   | 72,73,74,75,76,77,78 | 78          | 81    | 80,82          | 72,73,77      |
| 77 | Pro8 | H | H $\delta$ 1    | 3.96   | 72,73,74,75,76,77,78 | 75,76,77,78 | 82    | 79,80,81       | 63,65,75,76   |
| 78 | Pro8 | H | H $\delta$ 2    | 3.60   | 72,73,74,75,76,77,78 | 76,77,78    | 82    | 81             | x             |
| 79 | Pro8 | C | C $\alpha$      | 63.15  | x                    | x           | 72    | 74,75,77       | x             |
| 80 | Pro8 | C | C $\beta$       | 29.65  | x                    | x           | 73,74 | 72,76,77       | x             |
| 81 | Pro8 | C | C $\gamma$      | 24.96  | x                    | x           | 75,76 | 73,74,77,78    | x             |
| 82 | Pro8 | C | C $\delta$      | 47.30  | x                    | x           | 77,78 | 73,76          | x             |
| 83 | Pro8 | C | CO              | 170.42 | x                    | x           | x     | 1,72,74        | x             |

**Table S5.** Likelihood ratio tests of *FMO1* and *P450-29* genes among *Amanita*, *Galerina* and *Lepiota*.

| Species                                                        | <i>FMO1</i> |        |        |          | <i>P450-29</i> |        |        |          | <i>rbp2</i> |        |        |          |
|----------------------------------------------------------------|-------------|--------|--------|----------|----------------|--------|--------|----------|-------------|--------|--------|----------|
|                                                                | dN          | dS     | dN/dS  | Distance | dN             | dS     | dN/dS  | Distance | dN          | dS     | dN/dS  | Distance |
| <i>Amanita subjunquillea</i><br>vs. <i>Galerina marginata</i>  | 0.5226      | 1.0033 | 0.5209 | 1.9752   | 1.0034         | 0.3489 | 2.8762 | 2.497    | 0.0821      | 6.712  | 0.0122 | 5.9329   |
| <i>A. subjunquillea</i> vs.<br><i>Lepiota brunneoincarnata</i> | 0.9599      | 1.6527 | 0.5808 | 3.2686   | 0.9439         | 0.2916 | 3.2364 | 2.3514   | 0.1047      | 4.5    | 0.0233 | 3.9296   |
| <i>L. brunneoincarnata</i> vs<br><i>G. marginata</i>           | 0.9609      | 1.7225 | 0.5578 | 3.1642   | 0.8985         | 0.3942 | 2.2791 | 2.3159   | 0.0859      | 5.2655 | 0.0163 | 3.681    |

**Table S6.** MSDIN genes in amanitin-producing *Lepiota* and *Galerina* species, including *L. brunneoincarnata* (*Lb*), *L. venenata* (*Lv*), *L. subincarnata1* (*Ls1*), *L. subincarnata2* (*Ls2*), *G. sulciceps* (*Gs*) and *G. marginata* (*Gm*).

| Species name                    | No. | Leader peptide | Core Peptide | Recognition Sequence | Coding and Notes       |
|---------------------------------|-----|----------------|--------------|----------------------|------------------------|
| <i>Lepiota brunneoincarnata</i> | 1   | MDANTTRLP      | IWGIGCNP     | WAPESVNDTLTRGK       | $\alpha$ -amanitin     |
|                                 | 2   | MDANSTRLP      | IWGIGCNP     | WAPESVNDTLTRGK       | $\alpha$ -amanitin     |
|                                 | 3   | TSDINSARLP     | VSATAYSA     | WSPDIANDPVNHG        | lacking ATG            |
| <i>Lepiota venenata</i>         | 1   | MDANATRLP      | IWGIGCNP     | WTPESVNDTLTK         | $\alpha$ -amanitin     |
|                                 | 2   | MSDANNTRLP     | FFAPGLPFPP   | WTGENADHILARSK       |                        |
|                                 | 3   | MSDANNTRLP     | FFVPGLPFPP   | WTGENADHILARSK       |                        |
|                                 | 4   | MSDLNNTLRP     | VVTVLFTPPP   | WSGESVDHSLTRSK       |                        |
| <i>Lepiota subincarnata 1</i>   | 1   | MDANATRLP      | IWGIGCNP     | WTPENVNDTLTRGK       | $\alpha$ -amanitin     |
|                                 | 2   | MLDANNTRLP     | LVAAVGIPP    | WSGEDADHTLTRGK       |                        |
|                                 | 3   | MSDANSTRLP     | FVLLLVPP     | WTGEGFDNTLTRGK       | 2 copies in <i>Ls2</i> |
|                                 | 4   | MSDVNSXRLP     | IALVLXLFP    | WTGEGFDNTLTRGK       | 2 copies in <i>Ls2</i> |
|                                 | 5   | MSEANSARLP     | IPILAHLGP    | WTGEGFDSTLTRGK       |                        |
|                                 | 6   | MSDANNTRLP     | LFFPLPIPP    | WSGEDTDHTLTRGK       | 2 copies in <i>Ls2</i> |
| <i>Lepiota subincarnata 2</i>   | 1   | MDANATRLP      | IWGIGCNP     | WTPENVNDTLTRGK       | $\alpha$ -amanitin     |
|                                 | 2   | MSDANSTRLP     | FVLLLVPP     | WTGEGFDNTLTRGK       | 2 copies in <i>Ls1</i> |

|                               |   |            |           |                |                              |
|-------------------------------|---|------------|-----------|----------------|------------------------------|
|                               | 3 | MSDVNSXRLP | IALVLXLP  | WTGEGFDNTLTRGK | 2 copies in Ls1              |
|                               | 4 | MSEANSARLP | IPILAHXGP | WTGEGFDSXLTRGK |                              |
|                               | 5 | MSDANNTRLP | LFFPLPIPP | WSGEDTDHTLTRGK | 2 copies in Ls1              |
| <i>Galerina<br/>sulciceps</i> | 1 | MFDTNATRLP | IWGIGCNP  | WTAEHVDQTLASG  | $\alpha$ -amanitin, 2 copies |
| <i>Galerina<br/>marginata</i> | 1 | MFDTNATRLP | IWGIGCNP  | WTAEHVDQTLASG  | $\alpha$ -amanitin           |
|                               | 2 | MFDTNSTRLP | IWGIGCNP  | WTAEHVDQTLVSG  | $\alpha$ -amanitin           |

---
