# Supplementary material for: Genes and evolutionary fates of the amanitin biosynthesis pathway in poisonous mushrooms
Source: PubMed Central journal article supplement — Proc Natl Acad Sci U S A. 2022 May 9;119(20):e2201113119. doi: 10.1073/pnas.2201113119 (PMC9171917; doi:10.1073/pnas.2201113119), 2022-05-09
Supplement: pnas.2201113119.sd01.pdf [file pnas.2201113119.sd01.pdf]

**Datasets S1.** MSDIN genes in eight *Amanita* species, *A. subjunquillea* (As), *A. rimosa* (Ar), *A. pallidorosea* (Apa), *A. bisporigera* (Ab), *A. fuliginea* (Af), *A. molliuscula* (Am), *A. exitialis* (Ae), and *A. phalloides* (Aph).

| Species name                 | No. | Leader peptide | Core Peptide | Recognition Sequence | Coding and Notes            |
|------------------------------|-----|----------------|--------------|----------------------|-----------------------------|
| <i>Amanita subjunquillea</i> | 1   | MSDINATCLP     | IWGIGCNP     | CVGDEVAALLTRGEA      | $\alpha$ -amanitin          |
|                              | 2   | MSDINATRLP     | IWGIGCDP     | CVGDEVTALLTRGEA      | $\beta$ -amanitin, 2 copies |
|                              | 3   | MSDINATRLP     | IWGIGCDP     | CIGDNITALLTRGEA      | $\beta$ -amanitin, 2 copies |
|                              | 4   | MSDINATRLP     | AWLVDCP      | CVGDDINRLLTRGEK      | phalloidin                  |
|                              | 5   | MSDINATRLP     | AWLATCP      | CAGDDVNPTLTRGE       | phalloidin                  |
|                              | 6   | MSDINTARLP     | HFASFIPP     | CIGDDIEMVLKRGE       | 2 copies in <i>Aph</i>      |
|                              | 7   | MSDINTARLP     | TFLPPLFVPP   | CVSDDIEMVLTRGE       |                             |
|                              | 8   | MSDINTARLP     | AFFPPFFIPP   | CVSDDIEMVLTRGE       |                             |
|                              | 9   | MSDINTAALP     | FFFPPFFIPP   | CVSDDIEMVLTRGE       | 2 copies in <i>Aph</i>      |
|                              | 10  | MSDINVTCLP     | FIFWFFWPP    | CVGDDAASIIGK         |                             |
|                              | 11  | MSDINAARLP     | FIFPPFFIPP   | CVSDDIEMVLTRGE       |                             |
|                              | 12  | MSDINTARLP     | LRLPPFMIPP   | CVGDDIGMVLTRGE       | 2 copies in <i>Aph</i>      |
|                              | 13  | MSDINATRLP     | LNILPFMLPP   | CVGDDVNPTLTRGE       |                             |
|                              | 14  | MSDINTVCLP     | LQKPWSRP     | CVGDDIEMILERGEE      |                             |
|                              | 15  | MSDINATRLP     | IPILPIPP     | YCSDDANTTLTLGE       | 2 copies                    |
|                              | 16  | MSDINATRLP     | IPILPIPP     | YCSDDANTTLTLGE       | 2 copies                    |
|                              | 17  | MSDINTARLP     | IGRPESIP     | CVGDDIEMILERGQK      |                             |
|                              | 18  | MSDINATRLP     | SSVLPRP      | CVGDVDNIILTSREK      |                             |
|                              | 19  | MSDMNATRLP     | LIQRPYAP     | CVSDDVNSPLTRGE       |                             |
|                              | 20  | MSDMNATRLP     | LIQRPFAP     | CVSDDVDFALTRGE       | 3 copies in <i>Aph</i>      |

|                |    |            |             |                    |                                                                |
|----------------|----|------------|-------------|--------------------|----------------------------------------------------------------|
|                | 21 | MSDMNVARLP | ISDPTAYP    | CVGGDIHAVLRRGE     | 7 copies in <i>Aph</i> , <i>Apa</i> ,<br><i>Ab</i> , <i>Ar</i> |
|                | 22 | MSDMNVARLP | ISDPTAYP    | CVGGDIHAVLRRGE     | 7 copies in <i>Aph</i> , <i>Apa</i> ,<br><i>Ab</i> , <i>Ar</i> |
|                | 23 | MSDTNDARLP | LFFWFWFLWP  | SVSDDIDSVLNRGE     | 2 copies in <i>Aph</i>                                         |
|                | 24 | MSDVNATRLP | FNFFRFPYP   | CIGDDSASVL         | 3 copies in <i>Ar</i> , <i>Ab</i>                              |
|                | 25 | MFDINITRLP | IFWFIYFP    | CVGDNV             | 5 copies in <i>Ae</i> , <i>Aph</i> , <i>Af</i> ,<br><i>Ar</i>  |
| <i>Amanita</i> |    |            |             |                    |                                                                |
| <i>rimosa</i>  | 1  | MSDINSTRLP | IWGIGCNP    | SVGDEVTALLTRGEA    | $\alpha$ -amanitin, 2 copies                                   |
|                | 2  | MSDINATRLP | IWGIGCNP    | SVGDEVTALLASGEA    | $\alpha$ -amanitin, 2 copies                                   |
|                | 3  | MSDINATRLP | IWGIGCDP    | CVGDDVAALTTRGEA    | $\beta$ -amanitin                                              |
|                | 4  | MSDINATRV  | AWLVDCP     | CVGDDISRLLTRGEK    | phalloidin                                                     |
|                | 5  | MSDINATRLP | AWDSKHP     | CVGDDVSRLLRGE      | 2 copies                                                       |
|                | 6  | MSDINATRLP | AWDSKHP     | CVGDDISRLLTRGE     | 2 copies                                                       |
|                | 7  | MSDINATRV  | AWLAACP     | CVGDDISHLLTRGE     | 2 copies in <i>Ab</i>                                          |
|                | 8  | MSDINASRLP | FFIIVKP     | CGNPYVSDDVNSTLTRGE |                                                                |
|                | 9  | MSDINTSRLP | FIPLGIITILP | CVSDDVNTTITRGD     |                                                                |
|                | 10 | MSDINTACLP | FLFPVIPP    | CLSEDANVVVLNSGE    |                                                                |
|                | 11 | MSDINVTRLP | FFPIVFIPP   | CI                 |                                                                |
|                | 12 | MSDINIARLP | IFWFIYFP    | CVGDDVDNTLSRGE     | 5 copies in <i>Ae</i> , <i>Aph</i> , <i>Af</i> ,<br><i>As</i>  |
|                | 13 | MSDINVTRLP | IFLIMFIPP   | CIGDDAASILKQGE     |                                                                |
|                | 14 | MSDINTSCLP | IFIAFPIPP   | CVSDDIQTVLTRGE     | 2 copies                                                       |
|                | 15 | MSDTNTACLP | IFIAFPIPP   | CVSDDIQTVLTRGE     | 2 copies                                                       |

|    |            |             |                 |                                                                |
|----|------------|-------------|-----------------|----------------------------------------------------------------|
| 16 | MSDINASRLP | ILKKPWAP    | SVCDDVNSTLTRGE  |                                                                |
| 17 | MSDINVARLP | ISDPTAYP    | CVGDDIQAVVKRGE  | 7 copies in <i>Aph</i> , <i>Apa</i> ,<br><i>Ab</i> , <i>As</i> |
| 18 | MSDINATRLP | IIIVLGLIIP  | LCVSDIEMILTRGE  |                                                                |
| 19 | MSDINASRLP | IILAPIIP    | CISDDVNTTLTCAE  |                                                                |
| 20 | MSDINTTGLP | HFYNLMPP    | CFSDDTGMVLRGE   |                                                                |
| 21 | MSDINATRLP | HPFPLGLQP   | CAGDVDNFTLIKGE  | 4 copies in <i>Af</i> , <i>Apa</i>                             |
| 22 | MSDINASCLP | LILVANGMAYV | SDDVSPTLTRGE    |                                                                |
| 23 | MSDINTARLP | SYIPFPPP    | CLSEDTNAVLMLGE  | 2 copies                                                       |
| 24 | MSDINTARLP | SYIPFPPP    | CLSEDTNAVLMLGE  | 2 copies                                                       |
| 25 | MSDINTSRFP | SYGYRAFP    | CVGDDVEMVLMHGE  |                                                                |
| 26 | MSDINVTRLP | VLVFIFFLP   | CISDDAASIIKLGE  |                                                                |
| 27 | MSDIDTTRLP | LILFTLQP    | SIGDDVNPTLTRGEK |                                                                |
| 28 | MSDIHAARLP | FPTRPVFP    | SAGDDMIEVVLRGE  |                                                                |
| 29 | MSDNNAARLP | FYFYLGIP    | SDDAHPILTRGERLA |                                                                |
| 30 | MSDTNTARLP | ILFIQLEIP   | CISDDVHPVLTRGE  |                                                                |
| 31 | MSDVNTTRLP | FNFFRFPP    | CICDDSEKVLELGE  | 3 copies in <i>As</i> , <i>Ab</i>                              |
| 32 | MSEINTARFP | NHGHRTIP    | CVGDDIEMVLMHGE  |                                                                |
| 33 | MSEINTSRLP | LVFIPPYFAP  | CVSDDIQMVLTLGE  | 2 copies in <i>Af</i>                                          |
| 34 | MFDMNTTCLP | GFIIYAYV    | GDDVNHTLTRGE    |                                                                |
| 35 | MLDINTARLP | FSLPTFPP    | CVSDEIDVVLKRGE  |                                                                |
| 36 | MLDINATRF  | LGRPTHLP    | CVGDDVNYIL      |                                                                |
| 37 | MTDINDARLP | ILLIFFWIP   | CANDDDENILNRG   |                                                                |
| 38 | MTDINDTRLP | FVWILWLWLA  | CVGDDTSILNRGE   |                                                                |
| 39 | MPDINVTRLP | LLIIVLLTP   | CISDDNNILNRGK   |                                                                |

|                             |    |              |            |                 |                                   |
|-----------------------------|----|--------------|------------|-----------------|-----------------------------------|
| <i>Amanita pallidorozea</i> | 1  | MSDINATRLP   | IWGIGCNP   | CVGDEVTALITRGEA | $\alpha$ -amanitin, 2 copies      |
|                             | 2  | MSDINATRLP   | IWGIGCNP   | CVGDEVAALLTRGEA | $\alpha$ -amanitin, 2 copies      |
|                             | 3  | MSDINATRLP   | IWGIGCDP   | CVGDDVTGVLTRGEA | $\beta$ -amanitin                 |
|                             | 4  | MSDVNATRLP   | AWLVDCP    | CVGDDINRLLTRGEK | phalloidin                        |
|                             | 5  | MSDINATRLP   | AWLMTCP    | CVGDDVNPTLTRGE  |                                   |
|                             | 6  | MSDINASRLP   | AWLATCPCA  | GDDVNPTLTRGE    |                                   |
|                             | 7  | MSDINATRLP   | DPRRLLIP   | GGSDDVDSALTRDE  |                                   |
|                             | 8  | MSDINTARLP   | EFIVFGIFP  | CVGDDIQTVLTRGE  |                                   |
|                             | 9  | MSDINASRLP   | FFPEVGFFP  | CVGDDTNPILTRG   |                                   |
|                             | 10 | MSDINTIRVP   | FPWTGPFVP  | CVGDDVGSVLTHGE  | 2 copies in <i>Af</i>             |
|                             | 11 | MSDINTARLP   | FVIIPPFIFP | CVSDDIEMVLTRGE  |                                   |
|                             | 12 | MSDINATRLP   | HPFPLGLQP  | CAGDVDNLTLTRGE  | 4 copies in <i>Ar</i> , <i>Af</i> |
|                             | 13 | MSDINATRLP   | HPFPLGLQP  | CAGD            | 4 copies in <i>Ar</i> , <i>Af</i> |
|                             | 14 | MSDINAIRAPLP | IFSLNP     | CVGDDVEVL       |                                   |
|                             | 15 | MSDINVIRLP   | IFFIYFP    | CVGDNIDNTLT     |                                   |
|                             | 16 | MSDINAARLP   | LVYMILFP   | SVGDDIDVVLGRGE  |                                   |
|                             | 17 | MSDINATRLP   | LGRPESLP   | CVGDDVNYILVSG   | 2 copies in <i>Aph</i>            |
|                             | 18 | MSDINTARLP   | MHILAPP    | CVSDDIEMVLTRGE  |                                   |
|                             | 19 | MSDINATRLP   | NWHAGPTRPP | CVADDVSLTLTRGE  |                                   |
|                             | 20 | MSDINAARLP   | NLFVWIPP   | CISDDINSTLTRGE  |                                   |
|                             | 21 | MSDINTARLP   | VFFMPPFIPP | CVSDDIQMVLTRGEK |                                   |
|                             | 22 | MSDINTTRLP   | YFFNDHPP   | CASDDIQMVFTRGE  |                                   |
|                             | 23 | MSDVNATRLP   | MAFPEFLA   | CVGDDVNHTLTRGE  | 3 copies in <i>Ab</i>             |
|                             | 24 | MSDNASRLP    | YFFGFTP    | SVGDDVNPTLTRGE  |                                   |
|                             | 25 | MSDTNATRLP   | SIFIVYPP   | CVSDDVNSTLTRGE  |                                   |

|                    |    |            |            |                 |                                                               |
|--------------------|----|------------|------------|-----------------|---------------------------------------------------------------|
|                    | 26 | MSDMNVVRLP | ISDPTAYP   | CVGDDIQAVLGRGE  | 7 copies in <i>Aph</i> , <i>As</i> , <i>Ab</i> ,<br><i>Ar</i> |
|                    | 27 | MSDMNVVRLP | ISDPTAYP   | CVGDDIQAVLGRGE  | 7 copies in <i>Aph</i> , <i>As</i> , <i>Ab</i> ,<br><i>Ar</i> |
|                    | 28 | MSDMNTACL  | IFIVFIPP   | CVSDDIQTVLTRGE  |                                                               |
|                    | 29 | MSDLNATRLP | FNLFRFPYP  | CIGDDSGSVLTLGEG |                                                               |
|                    | 30 | MSETNAARLP | TIHLFSAP   | SVGDDIEVVLGRGE  |                                                               |
|                    | 31 | MSNINTARLP | FLVPSFPP   | CVSDDIQIVLTRGEK |                                                               |
|                    | 32 | MADINASRLP | LNILPFHLPP | CVSDDATSTLTRGE  | 2 copies in <i>Am</i>                                         |
|                    | 33 | MYDINTTRLP | HFFNLTPP   | CVRDDI          |                                                               |
| <i>Amanita</i>     |    |            |            |                 |                                                               |
| <i>bisporigera</i> | 1  | MSDINATRLP | IWGIGCNP   | CVGDDVTTLLTRGEA | $\alpha$ -amanitin, 2 copies                                  |
|                    | 2  | MSDINATRLP | IWGIGCNP   | CVGDDVTTLLTRGEA | $\alpha$ -amanitin, 2 copies                                  |
|                    | 3  | MSDINATRLP | AWLVDCP    | CVGDDVNRLLTRGE  | Phalloidin, 2 copies                                          |
|                    | 4  | MSDINATRLP | AWLVDCP    | CVGDDVNRLLTRGE  | Phalloidin, 2 copies                                          |
|                    | 5  | MSDINATRLP | AWLAECP    | CVGDDVNRLLTRGE  | 2 copies in <i>Ar</i>                                         |
|                    | 6  | MSDINVARLP | FSVLSIIPP  | CVNDDTSNTLTRGEK |                                                               |
|                    | 7  | MSDINATRLP | GMEPPSPMP  | CVGDADNFTLTRGKK |                                                               |
|                    | 8  | MSDINATRLP | GMDPPSPMP  | CVGDADNFTLTRGKK |                                                               |
|                    | 9  | MSDINVTRLP | GLPIIAIIP  | CVSDDVDSTLTRGQ  |                                                               |
|                    | 10 | MSDINVTRLP | GLPMVLP    | CVSDDVDSTLTRGQ  |                                                               |
|                    | 11 | MSDINTIRIP | GLGLIP     | YVGDDVESVLRERGE |                                                               |
|                    | 12 | MSDINTSRLP | IFWPIFAP   | CVSDDIDAVLRRGE  | 2 copies                                                      |
|                    | 13 | MSDINTSRLP | IFWPIFAP   | CVSDDIDAVLRRGE  | 2 copies                                                      |
|                    | 14 | MSDINATRLP | IFWYIYFP   | CVGGDVDNTLTRGE  |                                                               |

|    |            |            |                 |                                                                |
|----|------------|------------|-----------------|----------------------------------------------------------------|
| 15 | MSDINTSRLP | IFWPIFAP   | CV              |                                                                |
| 16 | MSDINAARLP | IIFEPIIP   | CISDEVDTTLTRGQ  | 3 copies                                                       |
| 17 | MSDINAARLP | IIFEPIIP   | CISDEVDTTLTRGQ  | 3 copies                                                       |
| 18 | MSDINAARLP | IIFEPIIP   | CISDEVDTTLTRGQ  | 3 copies                                                       |
| 19 | MSDINAIRAP | ILMLAIPP   | CVGDDIEVLRRGE   |                                                                |
| 20 | MSDINVTRLP | IVFLEFYS   | RVGDDVNSTLTRGEG |                                                                |
| 21 | MSDINATRLP | IWWYIYFP   | CVGGDNDNTLTRGE  |                                                                |
| 22 | MSDINTTSLP | MAFPEFLA   | CVGDDVNSTLTRGE  | 3 copies in <i>Apa</i>                                         |
| 23 | MSDINTTRLP | MAFPEFLA   | CVGDDVNSTLTRGE  | 3 copies in <i>Apa</i>                                         |
| 24 | MSDINATRLP | MIQRPFYP   | CASDDVTSTLTRGE  |                                                                |
| 25 | MSDINATRLP | LFYPPDFRPP | CVGDVDNFTLTRGEK |                                                                |
| 26 | MSDINATRLP | LFFPPDFRPP | CVGDVDNFTLTRGEK | 3 copies in <i>Ae</i>                                          |
| 27 | MSDINTARLP | LSSPMLLP   | CVGDDILMVLTGGE  |                                                                |
| 28 | MSDINTARLP | LSSPMLLP   | CVGDDILMVL      |                                                                |
| 29 | MSDMNVARLP | ISDPTAYP   | CVGDDIYAVLRRGE  | 7 copies in <i>Aph</i> , <i>As</i> ,<br><i>Apa</i> , <i>Ar</i> |
| 30 | MSDTNAMRLP | FFWPIIIPP  | CVGDDAASILKQGE  | 2 copies                                                       |
| 31 | MSDTNAMRLP | FFWPIIIPP  | CVGDDAASILKQGE  | 2 copies                                                       |
| 32 | MSDVNDTRLP | FNFFRFPYP  | CIGDDSGSVLRLGE  | 3 copies in <i>As</i> , <i>Ar</i>                              |
| 33 | MSGINAARLP |            | AVGDDVEMVLRRGE  |                                                                |
| 34 | MSGINAARLP |            | AVGDDVEMVLRRGK  |                                                                |
| 35 | MADINTARLP | CIGFLGIP   | SVGDDIEMVLRHGE  |                                                                |
| 36 | MFDINVTRLP | GLPMVLP    | CIGDDVDSTLTRGQ  |                                                                |
| 37 | MLDINATRLP | IGRPQLLP   | CVAGDVNYILVSGE  | 3 copies in <i>Ae</i>                                          |
| 38 | MLDINTTRLP | IGRPQLLP   | CVAGDVNYILVSGEK | 3 copies in <i>Ae</i>                                          |
| 39 | MTDINDTRLP | FIWVLWLWLL | SVGDDITIL       |                                                                |

|                          |    |            |            |                  |                                                               |
|--------------------------|----|------------|------------|------------------|---------------------------------------------------------------|
|                          | 40 | MTDINDTRLP | FIWVLWLWLL | SVGDDITIL        |                                                               |
| <i>Amanita fuliginea</i> | 1  | MSDINATRLP | IWGIGCNP   | SVGDEVTALLTSGEA  | $\alpha$ -amanitin, 2 copies                                  |
|                          | 2  | MFDINATCLP | IWGIGCNP   | SVGDEVTAVLTRGEA  | $\alpha$ -amanitin, 2 copies                                  |
|                          | 3  | MSDINATRLP | IWGIGCDP   | CVGDDVAALITRGEA  | $\beta$ -amanitin                                             |
|                          | 4  | MSDINATRLP | AWLVDCP    | CVGDDVNRLRLARGE  | phalloidin                                                    |
|                          | 5  | MSDINASRLP | AWLATCP    | CIGDDVNPTITRGE   | phalloidin                                                    |
|                          | 6  | MSDINATRLP | AWLVTCP    | CVGDDINRLLTRGEK  |                                                               |
|                          | 7  | MSDINAARLP | ATYIPFFFPP | CVGDDIHAPSSGPLLC |                                                               |
|                          | 8  | MSDINTARLP | FLFFILPP   | CVSDDIEMVLTRGEK  |                                                               |
|                          | 9  | MSDINAARLP | FFPFVFIPP  | CIGDDATSIVRQAE   |                                                               |
|                          | 10 | MSDINATRLP | GILIVFPP   | CVGDDVNSTLTRGE   |                                                               |
|                          | 11 | MSDINATRLP | HLFTWIPP   | CISDDSTLTRGE     |                                                               |
|                          | 12 | MSDINATRLP | IFWFIYFP   | CVGDDVDNTLTRGE   | 5 copies in <i>Ae</i> , <i>Aph</i> , <i>As</i> ,<br><i>Ar</i> |
|                          | 13 | MSDINSARLP | LFFPPIFIPP | CVSDDVQVVLTRGE   | 2 copies                                                      |
|                          | 14 | MSDINSARLP | LFFPPIFIPP | CVSDDVQVVLTRGE   | 2 copies                                                      |
|                          | 15 | MSDINVTRLP | VLVFIFFPP  | YISDDAVNILKQGE   |                                                               |
|                          | 16 | MSDINSLRLP | VVNSRFNP   | CVGDDVSPTLTRGE   |                                                               |
|                          | 17 | MSDINTIRIP | FPWTGPFVPP | CVSDDVGSVLMRGE   | 2 copies in <i>Apa</i>                                        |
|                          | 18 | MSDINTTRLP | YYLLLILPP  | CVSDDLQTVLTRGEK  |                                                               |
|                          | 19 | MSDTNATRLP | IWFIQLQIP  | CAGDDVNSSLTRGE   |                                                               |
|                          | 20 | MSDTNATRLP | GIIVVGLP   | CIGDDVNSTLTRSE   |                                                               |
|                          | 21 | MSDTNTARLP | LIFIPPYMPP | CVNDDIQMVLTRGEK  |                                                               |
|                          | 22 | MSDTNTARVP | LVFIPPYFAP | CVNDDIQMVLTRGE   | 2 copies in <i>Ar</i>                                         |

|                    |    |            |            |                  |                              |
|--------------------|----|------------|------------|------------------|------------------------------|
|                    | 23 | MSDNNTSRLP | VLLKPWAP   | YVSDDVSSTLTRGERL |                              |
|                    | 24 | MSDLNASRLP | ILSVLGLPVP | HVGEETNSTLARGE   |                              |
|                    | 25 | MSCINATRLP | LPSRPVFP   | FVSDAIEVVLGRGE   |                              |
|                    | 26 | MSDANTACL  | IFLVFPIPP  | CVSDDIQMVLTRGEG  |                              |
|                    | 27 | MFDINGSRLP | AFRLIPPP   | CVGDDVDSTLTSGE   |                              |
|                    | 28 | MFDINSSRLP | HLYPNSRP   | CVCDDACSTLTSAE   |                              |
|                    | 29 | MFDINSSRLP | SAGLPESP   | GDFDSTLTSGE      |                              |
|                    | 30 | MFDTNATCLP | HPFPLGLQP  | CAGEVDNFTLTKGE   | 4 copies in <i>Ar, Apa</i>   |
| <i>Amanita</i>     |    |            |            |                  |                              |
| <i>molliuscula</i> | 1  | MSDINATRLP | IWGIGCNP   | CVGDDVTLLTRGEA   | $\alpha$ -amanitin, 3 copies |
|                    | 2  | MSDINATRLA | IWGIGCNP   | CVGDDVTALLTRGEA  | $\alpha$ -amanitin, 3 copies |
|                    | 3  | MSDINATRLA | IWGIGCNP   | CVGDDVTALLTRGEA  | $\alpha$ -amanitin, 3 copies |
|                    | 4  | MSDINATRLA | IWGIGCDP   | CVGDDVTALLTRGEA  | $\beta$ -amanitin            |
|                    | 5  | MSNINASRLP | IWAAFFRFP  | CVGDEVDGILRSGE   |                              |
|                    | 6  | MSDINATRFP | GKVFPP     | YVGDDVDDIIRGE    |                              |
|                    | 7  | MSDINATRFP | GKVNPP     | YVGDDVDDIIRGE    |                              |
|                    | 8  | MSNINATRFP | GKLFPP     | YVGDDVDDIIRGE    |                              |
|                    | 9  | MSNINALRLP | GFGFIP     | YASGDVDYTLTRGE   |                              |
|                    | 10 | MSDINSIHLP | GGYYQNT    | FVGDDVEGILNRGE   |                              |
|                    | 11 | MSDINASRLP | RLLVPRYP   | CIDEDAEAILRSGE   |                              |
|                    | 12 | MTDINATRLP | LNILPFHLPP | CVDDVDNTHLSGEK   | 2 copies in <i>Apa</i>       |
|                    | 13 | MTDINATRLP | LIFLPPFIPP | CVDDVDNTHLSGEK   | 2 copies                     |
|                    | 14 | MTDINATRLP | LIFLPPFIPP | CVDDVDNTHLSGEK   | 2 copies                     |
|                    | 15 | MTDINATRLP | ILFGFFLLP  | CVDGVDNTHLSGEK   |                              |
|                    | 16 | MTDINATRLP | WFFFFYPP   | CVDDVDNTHLSGEK   |                              |



|                  |    |            |            |                  |                                    |
|------------------|----|------------|------------|------------------|------------------------------------|
|                  | 17 | MTDINATRLP | FNILPLLLPP | CVDDVDNTLHSGEK   |                                    |
|                  | 18 | MTDINATRLP | FFWILIPP   | CVDDVDNTVHSGDK   |                                    |
|                  | 19 | MTDINATRLP | WIFFFYPP   | CVDDVDNTLHSGEK   |                                    |
| <i>Amanita</i>   |    |            |            |                  |                                    |
| <i>exitialis</i> | 1  | MSDINATRLP | IWGIGCNP   | CVGDDVTSVLTRGEA  | $\alpha$ -amanitin                 |
|                  | 2  | MSDINATRLP | IWGIGCDP   | CVGDDVTALLTRGEA  | $\beta$ -amanitin                  |
|                  | 3  | MSDINATRLP | AWLVDCP    | CVGDDVNRLLTRGE   | phalloidin                         |
|                  | 4  | MSDINATRLP | AWLTDCP    | CVGDDVNRLLTRGE   |                                    |
|                  | 5  | MSDINTTRLP | FVVASPP    | CVGDDIAMVLTRGE   |                                    |
|                  | 6  | MSDINTARLP | FIWVFGIP   | GDDIGTVLTRGEK    |                                    |
|                  | 7  | MSDINLTRLP | GIIAIP     | CVGDDDDVNSTLTRGQ |                                    |
|                  | 8  | MSDINATRLP | IILAPVIP   | CISDDNDPTLTRGQ   |                                    |
|                  | 9  | MSDINTARLP | IPIPPFFFP  | FVSDDIEIVLRRGEK  | 2 copies                           |
|                  | 10 | MSDINTARLP | IPIPPFFFP  | FVSDDIEIVLRRGEK  | 2 copies                           |
|                  | 11 | MSDINATRLP | IGRPQLLP   | CVGGDVNYILISGEK  | 3 copies in <i>Ab</i>              |
|                  | 12 | MSDINPTRLP | IFWFIYFP   | CVSDVDSTLTRGE    | 5 copies in <i>Af, Aph, As, Ar</i> |
|                  | 13 | MSDINTARLP | IYRPPFYALP | CVGDDIQAVLTRGE   |                                    |
|                  | 14 | MSDINTARLP | IWIIGNP    | CVSDDVERILTRGE   |                                    |
|                  | 15 | MSDINVIRAP | LLILSILP   | CVGDDIEVLRRGE    |                                    |
|                  | 16 | MSDINATRLP | LFFPPDFRPP | CVGDADNFTLTRGEK  | 3 copies in <i>Ab</i>              |
|                  | 17 | MSDINATRLP | LFFPPDFRPP | CVGDADNFTLTRGE   | 3 copies in <i>Ab</i>              |
|                  | 18 | MSDINVIRLP | SMLTILPP   | CVSDDASNTLTRGE   |                                    |
|                  | 19 | MSDINTARLP | VFSLPVFFP  | FVSDDIQAVLTRGE   |                                    |
|                  | 20 | MSDINVTRLP | VFIFFFIPP  | CVGDGTADIVRKGEK  |                                    |

|                           |    |            |            |                 |                                   |
|---------------------------|----|------------|------------|-----------------|-----------------------------------|
|                           | 21 | MSDINATRLP | VWIGYSP    | CVGDDCIALLTRGE  | 2 copies                          |
|                           | 22 | MSDINATRLP | VWIGYSP    | CVGDDCIALLTRGE  | 2 copies                          |
|                           | 23 | MTDINDTRLP | FIWLLWIWLP | SVGDDNNILNRGEE  |                                   |
| <i>Amanita phalloides</i> | 1  | MSDINATCLP | IWGIGCNP   | CVGDEVAALLTRGEA | $\alpha$ -amanitin                |
|                           | 2  | MSDINATRLP | IWGIGCDP   | CIGDDVTALLTRGEA | $\beta$ -amanitin, 2 copies       |
|                           | 3  | MSDINATRLP | IWGIGCDP   | CVGDEVTALLTRGEA | $\beta$ -amanitin, 2 copies       |
|                           | 4  | MSDINATRLP | AWLVDCP    | CVGDDINRLLTRGEK | phalloidin                        |
|                           | 5  | MSDINTTCLP | AWLATCP    | CTGDDVNPTLTCGE  | Phalloidin, 3 copies              |
|                           | 6  | MSDINASRLP | AWLATCP    | CVGDDVNPTLSRGE  | phalloidin, 3 copies              |
|                           | 7  | MSDINTTCLP | AWLATCP    | CAGGDVNPTLTCGE  | phalloidin, 3 copies              |
|                           | 8  | MSDINAARLP | FIFPPFIIPP | CVSDDIEMVLTRGE  |                                   |
|                           | 9  | MSDINTARLP | FFFPPFFIPP | CVSDDIEMVLTRGE  | 2 copies in <i>As</i>             |
|                           | 10 | MSDINITRLP | FFPIVFSPP  | CIGDDTASIIKQGK  |                                   |
|                           | 11 | MSDINATRLP | FNILPFMLPP | CVSDDVNPTLTRGE  |                                   |
|                           | 12 | MSDINATRLP | FILAPIIP   | CINDDVNSTLTSGE  |                                   |
|                           | 13 | MSDINITRLP | IFWFIYFP   | CVGDNDNTLTRGE   | 5 copies in <i>Ae, As, Af, Ar</i> |
|                           | 14 | MSDINATRLP | IVGILGLP   | CIGDDVNSTLTHGE  |                                   |
|                           | 15 | MSDINATRLP | LILLAALGIP | SDDADSTLTRGE    |                                   |
|                           | 16 | MSDINTARLP | LRLPPFMIPP | CVGDDIEMVLTRGEK | 2 copies in <i>As</i>             |
|                           | 17 | MSDINAARLP | SFFFVP     | CISDDIEMVLTRGE  |                                   |
|                           | 18 | MSDINAARLP | SFFFPI     | CISDDIEMVLTRGE  |                                   |
|                           | 19 | MSDINVTRLP | TIYYLYFIP  | CVGDDTANIAKQGE  |                                   |
|                           | 20 | MSDINTACLP | VQKPWSRP   | CVGDDIEMILERGE  |                                   |

|    |            |            |                |                                    |
|----|------------|------------|----------------|------------------------------------|
| 21 | MSDIKSTRLP | LGRPESLP   | CVGDDIEMILERG  | 2 copies in <i>Apa</i>             |
| 22 | MSDMNVARLP | ISDPTAYP   | CVGGDIQAVLRRGE | 7 copies in <i>Apa, As, Ab, Ar</i> |
| 23 | MSDMNATRLP | LIQRPFAP   | CVSDDVNPALTRGE | 3 copies in <i>As</i>              |
| 24 | MSDMNTTRLP | LIQRPFAP   | CVSDDVNSALTRGE | 3 copies in <i>As</i>              |
| 25 | MSDTNDARLP | LFFWFWFLWP | SVSDDIDSVLNRGE | 2 copies in <i>As</i>              |
| 26 | MSDTNTACL  | IFLAFPIPP  | CVGDDIEMVLRRGE |                                    |
| 27 | MSDVNATRLP | FNLFRFPYP  | CIGDDSASVLGLGE |                                    |
| 28 | MSNINVTRLL | FMPLAP     | LRGDDATSIVKRGE |                                    |
| 29 | MSEINTARLP | HFAFIPP    | CIGDDIEMVLKRGE | 2 copies in <i>As</i>              |

---
