# Supplementary material for: Genes and evolutionary fates of the amanitin biosynthesis pathway in poisonous mushrooms
Source: PubMed Central journal article supplement — Proc Natl Acad Sci U S A. 2022 May 9;119(20):e2201113119. doi: 10.1073/pnas.2201113119 (PMC9171917; doi:10.1073/pnas.2201113119), 2022-05-09
Supplement: pnas.2201113119.sd02.pdf [file pnas.2201113119.sd02.pdf]

## Dataset S2

>Amanita\_rimosa

TAATTCACCTGTGCATGCTTGTAGACACTTGGGAATGAGAGACTTTAACCAGCCCCTTGAGAAATTGAACTTTCCAATCTCTGGGTGTCTATGCCATTTTT  
AAAACACCAGTTGCATGTTTATAGAATGATATGATTACCATGTAAAATACAACCTTTCAACAACGGATCTCTTGGCTCTCGCATCGATGAAGAACGCAGCGAA  
ATGCGATAAGTAATGTGAATTGCAGAATTCAGTGAATCATCAAATCTTTGAACGCACCTTGCCTCCTTGGCATTCTGAGGAGCATGCCTGTTTGTGAGTGC  
ATTAATATCTCAAGACCTGTCTGCTTTTGTAGGTTTCGGATTTATGGGGTTCAGGCTTGTTCAAATAGCTTGCTCTCCTTGAATGTATTATTAGTGGA  
GGGAAGAAAAAGTCATTAAACTCCATTGGTGTGATAAAAATGGTATCAATGCCAGGAGCAATGAACAACAGTTCTCTCAGCTAACTGTCTGTAGTAAAACAA  
TGGACAACCTTGACCAACTTGACCTCAAATCAGGTAGGACTACCCGCTGAACTTAAGCATATCAATAAGCGGAGGAAAAGAACTAACAAGGATTCCCCTA  
GTAAGTGCAGTGAAGCGGAAAAGCTCAAATTTAAAATCTGGCAGATATCAGTCTGTCCGAGTTGTAACCTAGAGAAGTGTAGCCTGTGCTGGACCATG  
TACAAGTCTCCTGGAATGGAGCATCATAGAGGGTGAGAATCCCGTCTTTGACATGGACTACCAGTGCCTGTGGTTGCACACTCAACGAGTCGAGTTGTT  
TGGGAATGCAGCTCTAAATGGGTGGTAAATTCATCTAAAGCTAAATATTGGCGAGAGACCGATAGTGAACAAGTA

>Amanita\_exitialis

AAAGGCCTCCAAGATGCGACATGCCTACATAATACTTCGAATTAGGAGGAAATCTGCCTGTGTGACACAAACAGCTTAGGTATATACCGCTATATAACGAT  
GGATGGAACACAAGATTACTAATGTTTTAGTTGGAAGCGTAAAATTTCCAACATAACACCAAGCAATACAGTTGTACTTATCGTTTGAATAAGTTAGCCAG  
TGGTCTATATTAGTAGCCAATATTTAGCTTCGCGTTGGATATTGTGTGAAAGTATAGATTTACTAAGATTTTCGCAACTAATGTATTCTGGTGTATAAGCAAT  
GCTTAAAAAAGAGACATCTTTTTTATAAAAAAATTGACAATATAATAAAACAATTTTTTACTCTAAGCAGTGGATCACTTGGCTCATGGGTCGATGAAGAA  
CGCAGCAAACCTGCGTGCATCATGTGAACTGCAGGACACATGAACATCGACATTTTGAACGCATATTGCAGTCCATGCTATATGTACATTAATTTTTCTAAA  
ATTTCTGTACTGCTTGGACTACACATGGTTGAGGGTTGTGAGACTATGCTAATCAAGTTGCTTACTTACTAAGACCTTAAACAGTTTTCTAAGTTTTAAAGC  
ACATGTTATATTATTGGTGAACATTCGGTAAAACGTTTATGAAACCATAATGTAGAATTTATTTGAAACTGCTATGAAATTCCTGTTACCAATAACATACGG  
GTTCTGGATTTTCGTCACTAGTGTGTAACACCATATACATTCCTAGATTAGAGCGAACAATACAGAATTGCTTATGGTAGCTTCTTTGTTTTTTAAGCGGTAT  
GAAATATATTCGTGATGGATGGTTTGGCAATATTCTTTTGTCAAACCTTTAGCAATACATTAATA

>Amanita\_subjunquillea

CACCGCCCGTCTGCTACTACCGATTGAATGGCTTAGTGAGGTCTCCGGATTGGCTTCGGGGAGCCGGCAACGGCACCTTGTTGCTGAAAAGCTGATCAAA  
CTTGGTCATTTAGAGGAAGTAAAAGTCGTAACAAGTTTTCCGTAGGTGAACCTGCGGAAGGATCATTAAATGAAATGAACCTTGAGGCTGTGCTGGCCCC  
TCTGGGGCATGTGCACGTCTCTGGTCATTACTAATTCCACCTGTGCACACTTGTAGACACTTGGGAATGAGAGACCTTGACCAGTCTCTTGAGAAATTGAA

CATCTGGGTGTCTATGCCATTTTATTAACACTAGTTGCATGTTTATAGAATGATGATTTGATTAATATAAAGTACAACCTTTCAACAACGGATCTCTTGGCT  
CTCGCATCGATGAAGAACGCAGCGAAATGCGATAAGTAATGTGAATTGCAGAATTCAGTGAATCATCGAATCTTTGAACGCACCTTGCCTCCTTGGCATT  
CCGAGGAGCATGCCTGTTTGAAGTGTCAATTAATTCTCAAGACCTGTCTGCTTTTTTATAGGTATTGGATTTTGGGGTTGCAGGCTGTTTCAAATAAATAG  
CCTTGCTCTCCTTGAATGTATTAGTGGAGAAAAGCCATTGAACTCCATTGGTGTGATAAAACCTATCAATGCCAGGAGCAATATCACTACTTCTCTCTGCTG  
TCTAACTGTGACTGTCTGTATGAATTAATATGGATGGGGACAACCTTGACCAACTTGACCTCAAATCAGGTAGGACTACCCGCTGAACTTAAGCATATCAAT  
AAGCGGAGGAAAAGAACTAACAAGGATTCCCCTAGTAACTGCGAGTGCCGCAAGGCCGGGTTTCGACCACGTTT

>Amanita\_pallidrosea

TTTCCGTAGGTGAACCTGCGGAAGGATCATTACTGAAATGAACCTTGAGGCTGTTGCTGGCCCATCTGGGCATGTGCACGTCTCTGGTCATTACCAATTC  
CACCTGTGCACACTTGTAGACACTTGGGAATGAGAGACTTTGACCAGTCTCTTGAGAGAATTGAAATCTGGGTGTCTATGCCATTTTACCAAACACTAGTT  
GCATGTTTATAGAATGATTATTTGATTGAATATAAATACAACCTTTCAACAACGGATCTCTTGGCTCTCGCATCGATGAAGAACGCAGCGAAATGCGATAAGT  
AATGTGAATTGCAGAATTCAGTGAATCATCGAATCTTTGAACGCACCTTGCCTCCTTGGCATTCCGAGGAGCATGCCTGTTTGAAGTGTCAATTAACACCTC  
AAGACCTGTCTGCTTTTTGATAGGTATTGGATTTTGGGAGTTGCAGGCTGTTTCAGATATAGCTTGCTCTCCTGGAATGTATTAGTGGAGAAAAGCTGTTGA  
ACTCCATTGGTGTGATAAAATCTATCAATGCCAGGAGCAACATCAAGTGGTCTCTGCTGTCTAACCCTAACTGTCTGACCCACTTGACCTCAAATCAGGTA  
GGACTACCCGCTGAACTTAAGCATATCAATAAGCGGAGGAAAAGAACTAACAAGGATTCCCCTAGTAACTGCGAGTGAAGCGGGAAAAGCTCAAATTTA  
AAATCTGGCAGATTTTTGTCTGTCCGAGTTGTAACCTAGAGAAGTGTAACTGTGCTGGACCGTGTACAAGTCTCCTGGAATGGAGCATCATAGAGGGTG  
AGAATCCCCTCTTTGACATGGACTACCAGTGCCTGTGGTTGCGCACTCGACGAGTTCGAGTTGTTTGGGAATGCAGCT

>Amanita\_molliuscula

AGGATCATTAGTGAATGAACCATGAGGCTGTTGCTGGCCCTTGTGGGCATGTGCACGTCTCTCTGGTCATTACCAATTCACCTGTGCACACTTTGTAGA  
CACTTGGGAATGCAGAGACTTTGACCAGTCTCTTGAGGAGTTGAAATCTGGGTGTCTATGCCATTTTATCAAAACCTAGTTGCATGTCTATAGAATGACAAT  
TTGATTTATATGTAAAAATACAACCTTTCAACAATGGATCTCTTGGCTCTCGCATCGATGAAGAACGCAGCGAAATGCGATAAGTAATGTGAATTGCAGAATT  
CAGTGAATCATCGAATCTTTGAACGCACCTTGCCTCCTTGGCATTCCAAGGAGCATGCCTGTTTGAAGTGTCAATTAAGTCTCAAGACCCTGTCAGCTTT  
TTGTTGATAGGTATTGGATTTTGGGGTTTGCAGGCTTTTCTCAGATAAGGCCAGCTCTCCTTGAATATATTAGTGGAGATGAAAGCCATTTGAACTCCAT  
TGGTGTGATAAAATCTATCAATGCCAGGAGCAATGTTGGTTCTCTCTGCTGTTTTAATTGTCTGTGGAAATGGAATGGACAAATTGACCCAACTTGACCT  
CAAATCAGGTAGGACTACCTGCTGAACTTAAGCATATCAATAAGCAGAGGAAAAGAACTAACAAGGATTCCCCTAGTAACTGCGAGTGAAGCGGGAAAA  
GCTCAAATTTAAATCTGGCAGGCATTAGTCTGTCCGAGTTGTAATCTAGAGAAGTGTAACTGTGCTGGACCATGTACAAGTCTCCTGGAATGGAGCATC

GTAGAGGGTGAGAATCCCGTCTTTGACATGGACTACCGAGTGCCTGTGGTTGCACACTCAACGAGTCGAGTTG

>Amanita\_fuliginea

CACGCCCGTCGCTACTACCGATTGAATGGCTTAGTGGAGGGTCTCCGGATTGGCTTCGGGGAGCCGGCAACGGCACTTTGTTGCTGAGAAGCTGATCAA  
ACTTGGTCATTTAGAGGAAGTAAAAGTCGTTAACAAGGTTTCCGTAGGTGAACCTGCGGAAGGATCATTAAAGAAATGAACCTTGAGACTGTCGCTGGCC  
CCCTCCTGCAGATGGAGTTGGCATGTGCACGTCTCTGGTCATTACCAATCCACCTGTGCACACTTGTAGACACTTGGGAATGAGAGACATGGGCTGCTT  
GGCTGGTCTCTTGAGAGAGAGAAATGGAAAAATCTGGTTGTCTATGCCATTTTTTATTAACACTAGTTGCATGTTTATAGGAATGAATGATGATTTGATT  
GAATATGAAATACAACCTTTCAACAACGGATCTCTGGCTCTCGCATCGATGAAGAACGCAGCGAAATGCGATAAGTAATGTGAATTGCAGAATTCAGTGAA  
TCATCGAATCTTTGAACGCACCTTGCCTCCTTGGCATTCTGAGGAGCATGCCTGTTTGAGTGTCTTAACATCTCAATACCTGTCTGCTTTTGATGGGTAT  
TGGAAATTGGGGGTTGCAGGGCTTGTATAGCTTTGCTCTCCTTGAATGTATTAGTGGAGAAAAAGAAAGCTCATTGAACTCCATTGGTGTGATAAAATCTA  
TCAATGCCAGGAACAATGTCCAAGTTTCTCTGCTGTCTAATCCATGTCCAGTTTGGACCTCATTGACCAACTTGACCTCAATCA

>Lepiota\_subincarnata1

GGCGGTTTGAAGGATTAACGGCAGTGACGACAATATACTTGGTACCCCCATGTCATCAGCCCTTCGTAGCGCATTGTCGTAGCGCTATTGAATCTGA  
ATGAGGCAGCGCCGCGTCGCGTCAATACTCGCGAAGCCATTGCATGCAGAGGATCCCAATGAGAACAGTGGTAAGGCTAAGTGTGAGACTAAGGAACCA  
GAAAATGTTAATTCTCTCCACGGCAGTCAACCACGTGTTGGAGTTCGGTGACTGCGGAAGAGGTACAGGAACAAAGCTCCTGTTACCGAGTTCGTTGATG  
CCGCTCAGCTGCAATGATATTTGACTCAGCAATTGATTGGTTATGTCGTTTGGATTGGGTTGAAGCCACTGGTATGATTCAATCACAATGCGGTAAGTGC  
AGCAGAAAAAGACCAGCCTAAAAGCGTCAAATTGACGTTTTAAAAGGTGATGTAGAGGTTGGCATGAGACGCACGAAAATGAGGAGTTTGTGACCTCA  
TCTGTCCAAATCTCACAAGGCTTTTGTGCTGCTTTTGTATGATGGTACTACAAGTTTCCCAATGTTGCGCTCTTCCAGGTACCGGATACTTGAATTGGGTR  
CCAGGCAGCCAGGCTTTGGGGTCGGGCTATTGTAGGGGCCGATAGGTGAGAGTGACGTTTTCGAGCGAAGACAGACACGCACAGGATTGGGGAAGATG  
CTGAGCTTTGGTACCACGGAGCGGTCAGCAAAGTTGTCCGCCGGTACCGGAACTAAAGTGGCCTTTGATGAGGGTAGCCCTGTAGGCGGTTGAGGAGA  
CTTTTTGGTGGTGTGCGTTATTAGTCAGTGATTGTTGCGATGCGACAAAGGTAACACAGACRTGCTATCGTTCTCCCCGAGTC

>Lepiota\_subincarnata2

ATGAGGCAGCGCCGCATCGCGTCGATACTCGCGAAGCCATTGCATGCAGAGGATCCCAATGAGAACAGTGGTAAGGCTAAGTGTGAGACTAAGGAACCA  
GAAAATGTTAATTCTCTCCACGGCAGTCAACCACGTGTTGGAGTTCGGTGACTGCGGAAGRGGTACAGGAACAAAGCTCCTGTTACCGAGTTCGTTGATG  
CCGCTCAGCTGCAATGATATTTGACTCAGCAATTGATTGGTTATGTCGTTTGGATTGGGTTGAAGCCACTGGTATGATTCAATCACAATGCGGTAAGTGC  
AGCAGAAAAAGACCAGCCTAAAAGCGTCAAATTGACGTTTTAAAAGGTGATGTAGAGGTTGGCATGAGACGCACGAAAATGAGGAGTTTGTGACCTCA

TCTGTCCAAATCTCACAAAGGCTTTTGTGCGTGCTTTTGTATGATGGTACTACAAGTTTCCCAATGTTTCGCCTCTTCCAGGTACCGGATACTTGAATTGGGTR  
CCAGGCAGCCAGGCTTTRGGGTCGGGCTATTGTAGGGGGCCGATAGGTGAGAGTGACGTTTTTCGAGCGAAGACAGACACGCACAGGATTGGGGAAGATG  
CTGAGCTTTGGTACCACGGAGCGGTCAGCAAAGTTGTCCGCCGGTACCGGAACTAAAGTGGCCTTTGATGAGGGTAGCCCTGTAGGCGGTTGAGGAGA  
CTTTTTGGTGGTGTGCGTTATTAGTCAGTGATTGTTGCGATGCGACAAAGGTAAGTACTCACAGACGTGCTATCGTTCTCCCCGAGTCAGAAATGGTTGGAAT  
GCTGAAGGACATGGTCYAACTCTGGACCCGAATGGGTGTCCAGGGCACACGATGCAAGGAAGCAGACGCGGCTAGGCYKWGGCTG

> *Lepiota\_brunneoincarnata*

ACTTTACTACATTCTACAGTAAGTGCAAGTCATTTGCTACTACTGATTGAATGGCTTAGTGAGGTCTCTGGATTGGCTTTGGGGAGCTTACAACAGCACCC  
TACTGCTAAGAAGCTGATAAACTTGGACATTTAGAGGAAGTAAAGTTGTGGCAAGGTTCTGTAGGTTAATCTGCAGAAGGGATCATTATTGAATAAACTT  
GGTGGGTGTTGCTGGATTCTCATCTGTGAGTTAGTTAGAGCCTATTCCCCTGTGTCACTGGTCAACTTACTATCATTTATCTTTAGTTTAGTTATGGTCCAT  
TGAATTTTGTAACTTTTCTCTAGCTTGTCTATCCCACTGGTTGAGCTACTGCCATTTAATTTTTGTGAGTTATTTAGAGCCTAAAGCCTGCTTGGAAATACAG  
GCTGGGCGTTTTACAAGGGTTTAGGGCAGGCCCTGGCCAGCTTGGGCCAGGCCTAACTTTTGCCACATTACTGCACATTACCACACATGATTGTACACT  
ACCGCATATTACCACACATGATTGTACACTACCGCACATTACCATAATTACCACACATGACCACACATTACCACACATTACTGCCACTTTACTGTGACACT  
ACTGTGACACACATGTGTGGTAGTGACAGTAGGGTGTGGTAGTGGTGGTGGCAAATTCACCATGCCACATTCTCTCTGTTCAAACACATCCGAGTTCATC  
AGAAAAGTCTCATAAGGTCCCTTGATGCAACCTGAGTATATTCAATAGGCTATGTAGAGTCCTGAATCCCTCTGGAGAGTGTACCAGTAGCTTAATTCAC  
TAAGCTTAGTGATAATGAACTGGTTTGAACACTTCCGAGGCTTGAATATCCTCAATTCAGTCAAAGTGGCTA

> *Lepiota\_venenata*

TTTGTACACACCGCCCGTCGCTACTACCGATTGAATGGCTTAGTGAGGTCTCCGGATTGGCTTTGGGGAGCCGGCAACGGCACCTTATTGCTGAGAAGC  
TGATCAAACCTTGGTCATTTAGAGGAAGTAAAGTCGTAACAAGGTTTCCGTAGGTGAACCTGCGGAAGGATCATTATTGAATAAACTTGGTGGGTTGTGCG  
TGGCTCCTCGGAGCATGTGCACGCTCATCACCTTATACATCCACCTGTGCACCTTCTGTAGTCTTGGGAATAAACGTAGTGAAACCTCGATAGGCCTTT  
TGGCTTACCGGATGTGAGGAATGCCTTCATTGGGCTCTCCTCAAAAACCTGCGATTGTTACTCAGACTATGTTTTTCATACACCATGTAGTATGTTGCAGA  
ATGTATCATTGGGCCCCTGTGCCTATAAAACACAATAACAATTTTCAGCAACGGATCTCTTGGCTCTCGCATCGATGAAGAACGCAGCGAAATGCGATAAGT  
AATGTGAATTGCAGAATTCAGTGAATCATCGAATCTTTGAACGCACCTTGCCTCCTTGGTATTCCGAGGAGCATGCCTGTTTGGAGTGCATTAATTTCTCA  
ACCACAATGGCTTTTTGTGAGCTTTTGTGGCTTGGATGTGGGGGTATTTTCTGCAGGCCTTCTAAAGGTGAGCTCCCCTGAAATACATTAGTGGAACCGTT  
TGCGGTGAGTACCGGTGTGATAATTATCTATGCCAAAAGACATAAACTGCTCTCTGTCTGTTCCCTGCTTCCAATTGTCTTATTAGACAACCTTTGAATATT  
GACCTCAAATCAGGTAGGACTACCGCTGAACTTAAAGCATATCAATAAGCGGAGGAAAAGAACTAACAAGGATTCCCCTAGTAACTGCG

>Galerina\_marginata

AGAGGAAGTAAAAGTCGTAACAAGGTTTCCGTAGGTGAACCTGCGGAAGGATCATTATTGAATGAACTTGGCGTGGTTGTCGCTGGCCCTCTCGGGGGG  
GTATGTGCACGCCCCTCATCTTTATCTTTCCACCTGTGCACACTTTGTAGACTTGAATAGTATTTTCTGAGGCAACTCAGTCGGGAGGATTGCTGGTATTTA  
TCAGCTCTCCTTGCATTATTCAAGCCTATGTTTTTCATATACCCCAAAAATGTAACAGAATGTATCATTGGGCCTTGTGCCTATAAACTATATACAACCTTTCA  
GCAACGGATCTCTTGGCTCTCGCATCGATGAAGAACGCAGCGAAATGCGATAAGTAATGTGAATTGCAGAATTCAGTGAATCATCGAATCTTTGAACGCA  
CCTTGCCTCCTTGGTATTCCGAGGAGCATGCCTGTTTGAGTGTCAATTAATTCTCAACCTTATCAATTTTCACAAGTTGGTAATGGCTTGGACTTGGGGG  
CTTTTTGCTGGCTTCGTCAAGAAGTCTGCTCCCCTTAAATGTATTAGCCGGTCCCCTTGTGGAGTCGTCTATTGGTGTGATAATTATCTACGCCGTGGGCC  
TTCACCTTAAATGGGTTGTAAGTCTGCTTCTAACCCTGCTGTTAAGTCAGACAAATAATGACAATTTGACCTCAAATCAGGTAGGACTACCCGCTGAACTTAAGCA  
TATCAATAAGCGGAGGAAAAGAACTAACAAGGATTCCCCTAGTAACTGCGAGTGAAGCGGGAAAAGCTCAAATTTAAATCTGGTGGTCTTTGGCCATC  
CGAGTTGTAATCTAGAGAAGTGTTATCCGCGCTGGACCGTGT

>Galerina\_sulciceps

AGAGGAAGTAAAAGTCGTAACAAGGTTTCCGTAGGTGAACCTGCGGAAGGATCATTAAATGAATAAACCTGATGTGGTTGTCGCTGACTCTTTCGAGGGTA  
TGTGCACGCCCCTCATCTTTATCTTTCCACCTGTGCACACTTTGTAGACTTGAATACTAATTTCTGAGGTCACTCAGTTGGGAGGATTGCTGGTATCTTATC  
GGCTGTCCTTGAATATTCAAGTCTATGTTTTTCATATACTCCAAAAATGTAACAGAATGTATCTTTGGGCCTTGTGCCTATAAACTATATACAACCTTTCAGC  
AACGGATCTCTTGGCTCTCGCATCGATGAAGAACGCAGCGAAATGCGATAAGTAATGTGAATTGCAGAATTCAGTGAATCATCGAATCTTTGAACGCACCT  
TGCGCTCCTTGGTATTCCGAGGAGCATGCCTGTTTGAGTGTCAATTAATTATCAACCTTACCAGTTTTCACAAATTGGTAATGGCTTGGACTTGGGGGTTT  
ATTTTGGCTGGCTTAGGTCTGCTCCCCTTAAATATATTAGCTGGTCTCCTTGTGGAGCTTGTCTATTGGTGTGATAATTATCTACGCCGTGGGCCTTCACTTT  
AAATGGATTGTAAGTCTGCTTCTAACCCTCCGTTAATTTGGACAATCAATGACAATTTGACCTCAAATCAGGTAGGACTACCCGCTGAACTTAAGCATATCAATA  
AGCGGAGGAAAAGAACTAACAAGGATTCCCCTAGTAACTGCGAGTGAAGCGGGAAAAGCTCAAATTTAAATCTGGTGGTCTTTGGCCATCCGAGTTGT  
AATCTAGAGAAGTGTTATCCGCGCTGGACCGTGT
