# Supplementary material for: Genes and evolutionary fates of the amanitin biosynthesis pathway in poisonous mushrooms
Source: PubMed Central journal article supplement — Proc Natl Acad Sci U S A. 2022 May 9;119(20):e2201113119. doi: 10.1073/pnas.2201113119 (PMC9171917; doi:10.1073/pnas.2201113119), 2022-05-09
Supplement: pnas.2201113119.sd03.pdf [file pnas.2201113119.sd03.pdf]

**Dataset S3**

>GmFMO

Upstream:

AGGACCATACCGGCGCTGCCATCAGCAGCGAGTACATTTGGCTTTTAAGAACGCATTTCAGAGAAGACGTCTGAGGCAGTGAAGGAGGCCCTACGT  
CGA  
AGAATACGTCGCCAACATTATCGTCGCCCTTGGAGAAATCAGGAAGCGCCGTTCCCTTGGAGCGGTAAAGAACTTGAAAATGTCTGAGTTTTGCACCCT  
CGTAGGACAAATAAATATCTACCTGACTGCGATTGCAGGCCTCGGTTGTAGAACCAATACCAATGTCCGTCATCGAGCAGAGTCGGTGCGGAAA  
ACTAGG  
AGAACGGGTTTCAGCCAGATGATAAGTTACGACTTTATACGATAAATTACCTTTGCGTAGTTTCTACTCGCACGAAATTTCTCCGCAAGTTTCTGA  
ATATCC  
GCGTTCTGATCAAGATATGATTGGGCAAGATCGGCCTGAGCAGTCGTCCATTTGTCTACTTCATCGGTGCTCTCTCCAGCCATTGGTAGGGGTCC  
GGCA  
CAGGTA  
CTTCGCCCTTGGACGCGCTCTGATAGGTATCGACATGGTCAGAACGACGGGTAGAGGGATAATTTCCAGGAGCCCAGGTTACAGACGACATAG  
TTTTCCGCAATTGTGGGGTCAGCGATACGGCTGGAAGACGGACATCGAAAAACCCTGTTTTTTAAGGGTACCAATAGGGTTGGTTTGGGATAACG  
TCCAC  
GGTCCGTGCCACTGTCACGATTTTAGATATGATAAAGGGCTTCTGGACAAAAGGGAGAAGTAGTAAGTGACAAGCCAAAGTTCTGCCATCAACAC  
ATTTCA  
AATTCAGTCCACCTAATTTTCAAATTCGTCGCGGTCCGATGAGGGCGTTTCATCGAGACAAAGAATGGATCATGGGGGCCATAAACAACACTGGG  
TG  
TGAAATAAAGCCTTGAACCAGTTATTTGGATGACTGTTCTATCAGAAGTGCAACATGCCGAATTTTCATGAACGCTATGTGTAAGGGCAACTGCT  
TTTTTCAG  
TATCATTCTCCTGCCATATATTTCTGTGAAGCTCACCTGACGAGTGTTATTACAATCTTGGGGTCAAAA  
ACTGACAGGGAAAGATGGAATACCGACGTGAT  
ATTATGAGCGTGTGGAGTAAGTCCTAAGAAAGTCCTGTCCTCCAAGTCCAAGTACCACCCTGATTGACTTCGTGTACATAATCACTCAATCAGACT  
CACC  
AACCTTCAGTATCCAAAAAGCCATTTAACAACGCTCGCGAGGCCACTCTTGGATGGAAA  
ACTCGAGTCCTGCATAAGCCTGAAGAAGGATTCAATTTCTT  
GCTTTGCGATGTTATTGGATGAGCGTAGATAATGACCGGTCCGGTAAGGGACCAGGGCGATATCAGTGGCTGTGCTTGACGGCCTTCACGGAAG  
CAACT  
GCCTGATCGGGCTTGACACAGGATAACGAGACGACGATGTTGGAACCAGGCAGGTCCCCACCAGTCCTCTACCGGTAGCCTTTACTGTCCTCGTA

Downstream:

ATCGCCACGAGGCATTTGCGACTTATTGTGTTAGGCAGTTC  
CAAGAAGCTCAACGGCAGTCATTTCGAATCGCTGAATGCAGCCTGTGAAGGGATTTCCGA  
AGGACCCTTCGCGAAGCTCGGATAAATAGCTAAAGAAATTTGGGGTGCTATAAGCGAAATCTCATTGGAGTTGAGCGGTGGCCAATGACATATTTATAC  
CGTGCGTTGGTGGCGCTGCTCGCCCTTGTACGAATAACCAGGATGAGAACAGCGCGCTATTTGGGGTGAACGAATTATCCAGAGGTGTCTGCGTGTC  
TCCCTCGGTAGTAGAGAGACATAGGAGAAGTCGAAGTATTCACAGCTTGTGTGGATCATTTACTATGTATACTATTTTCCAAGCAACAAACTCTCGGCTCA  
AGCTCAAGTTATGGCTCAAAATTTACATTTATTTCAACGGTGAGGATCATCAACGTAGGGTTTATCAATTTACAAATGCGAGTTGGTGTATGGTTTTATCGA  
TTTACAAAAGAGAAAGAATGGCTAGATGAAGGAAAAACAGTAGATGGGTCAGTACTCCTTAATACCACGTAATAAAGCACAAAGGTCTGACCTACGAAAAGG

CTCAATGTTCCAAGCCTAACATCGTCGATAAGTATCGTTGCCCACTGCTCGGAAATATCAGGCCTGTTGAATGCAATGCTTTGAGAGTAGTAAGATAGCCA  
CACCTTCGTGTTAAAGCGGGCGGGCCAACGACAGGCGGGACACGTTTCAGCAAATGCTAACGCACAACATGAGTACGTGCAACACGGCAACAACAGAAACC  
AAGCTTACTCGTTGCCACTAGCGAGAGTCTGGTCGACGTGCTCAGCAGTCCATGGGTTGCAGCCAATACCCAGATTGGGAGACGAGTAGCGTTGGTGT  
CGAACATTGTAGATGTTAAAGCAAAAAGGTCTTTGGTTAAGTGAGTTTTGTGGTTGGGGATTGGAGATCAGCTCTCACTGACGAACGCCTTTTATCTCTCT  
CGAGGACCGAATAGAGCTGATGAGTTAGGAAATAGCAGCGACTCCGCAAGCTGTGAACTTCTAGAATAAAGATCCAAGAACATTTTCGACGCCATTACGA  
GGACCTGTCTTCATTGGTGGAGTTCTGTGATCTTAGAGCATCTGACCAGCCCATGGGGAAGTTCCAGATCGGTGGTAAGTTAAGTAAACTCGCGCCGAG  
GTGTATCTTTGTCCACTTTGACAGAAGGCACGAAGGAGTACCAAGGTGGTTTTCGGCGATCCTCACATGGCATGGTGTTCAGATAACAGAGAACAGGCT  
CCTATAAAGAGATAACCTGATTCACCGAATAGTGGCAAAATGTCGTGGAGTCGTGGTTGTACCGATTGCCTAGCCAAAGTCAGTCCATCACAATTTTCGC  
CAGACGTAAGCTTGAAGCTGGAGCGCATGAGCCTGAAGGTTGCAGCAATGTAGTCACTGAAGTAACTAGCGAAGGGATAGTTTGAGGAACGTTTGT

>Gmp450-29

Upstream:

GCGGCGGAACGATATTTGGTACTTCACCAAGGAGTTTGTTCCTTGTGATCCTCCTCCTCGCCTTCTCTATCGAGCCCTTGATCTCGTTCCGCCTTTT  
AGGTTTTCTGGAGTTTTCTCCTTCGACCTCATCTCCAGCGTCTTGAGTGACGTGTTCCAGATCTCGATAGAGATGCAATGTTCCCTCAATCTTTTTAGTGAT  
AGCCATTGTTGCGTTTTTGTATGCACCGGTACCGAGGGCGATGATGTCTTCACGAGCTTGGTCCATGTTTCGTCTTCCGCGTCATGGGCTTGTTTTGAAAA  
GGGAGGGGGATGGGCAACATGGGCGCAGGTGAGGAGCGCGACCCGGTCGTTGTCATTGCCGAGGCGATAATATAAAGCGCCGGTCCCTTCAAATG  
AGGAGACTTTAAGGGTGCAATCGGTAGACCTAGAGCGTGGCTGAAGTCTTTCCTAAGTTCAGCGATAGGATCAAGGAGAGGATCAAGAGAGAGGAGCTT  
GGGTCCAGCGGAACGATGAAGACGGGATTCGATGAAGGCCACTTGGATGTTAGGAAAGCCAGCGTCCTTGAGGACACTGAGAACGGCATCTCCAGCAG  
CAACAGCATCGTCGTAAAGGAGTGAGTAAGGCTCGACGCCAATGGTAATAACGAAGGGGCAGAATGGATCGGCTTTTCCAGCATCGGCCTAGGCAAGG  
GGATTAATGGCATTCCAATCTACCTTGAGAGAGTTCGAGTTTGGCTACGATCCTCCACCCAATAGACAGCCAAAAAGGGCGAATAGGGTGATTGTAATGG  
GACGAGCGGCTCGGTATATCCCCTGAGCCTGGTTGCCCGTGCCTTGTACCATGCAGGCCAGTCTTATAGATACAGGGGGTCTCACTGCCGTAAAAAT  
CCGTGTAAGCATTGGTATATTTATCGGACAGTCGAACGCGTTCGACAGACATAATAAAGTAAAAAGGCTGAGTCCAAGGTCAACTAGAGAGAGGTTCCG  
TTAGTTGAGACTGTTGAGTGAGACCAAAGTGAGACAAGGTCTATGGCATCACCAGAGTGTTGAGACTCAAAGTCATTTCCGATTGCTTCTTGTGGGCA  
GTGAATTTTGAAGTGGTTGTGAATTTCCAGGTAGAAGGCTGCAGCGTTTTGGTCATCGATTAAGTGGTGTGTTGGTGGAGCCGGACCTGCAGATGTATGT  
GCCACATCTTTACGAAATCCATCAGACTCTTCAATTGAACATGTGGTGTGATCTTCAACAGTCTTCGCCTTCTTGAAGTTCTTCGCTCATATTCGGAGGGGA  
GAGGACTACTCTGCTTGAATTTTGTCTTCGTTCCGTTGAATCTGATAACGAAGGCGTGGGGGATATGGGTTTGATTACGTCTTTGACTGACTTTAGTTTGA

CAGGCAGCCTGAGGCAGGTGGTTTGGCTTCGGGTGACATCGTGAATGTTGCAGTCGCTGCTTGCGCCGCATATAAGAATCTGTTGCAGGCGGTTCTGTT  
GCTG

Downstream:

GACCATAGTGTGCAATTCAAGCTTGCATGCTTCAGATGATGGGAGTCAGTGCCTGTCCCATTTGTTGTTTCGCTCATCCTTATCAAACCTTGATGACGGTCAA  
CGCATGGGAGAACTATAACAAGTCCTGCGTCTATGTCGAAGTGGTCACCTGTGGAATCTTAATACGTATTTACTGTCTACTTCTGCAGGTTTGAACA  
GCAAGATTTCCAATCATATGGCATGTAAAGACGGATCTCGAAAATGCATGTTCCACATGAAGCCTTCCTTGAAGCATAAGAAGTACTACAAGACCAA  
GGTGTGGAACGAAGCCAGGCGGGTTCGTTTTACTCCTCGTCTTTCTGTATGCCTTCGCGGACTTCGACGTTGTCCATGCAATCTCGACATTCAGCCA  
TCATCCTTGGCCGCTTCGCCGGTTTGTGCGTCAGTCTCCTTGTCCCATGTTACAATATTGAAATATATGTAGAATTGCCACAGATGACGACTGAGCAC  
ATTACCTAAATTAATTAGCCTGGCAGAGTTGACAACCGAGGGAGGCTTTCCTTAGCGACTTCAAAGCCAGCAATTCTGACTGCGATCATCACTGATCAA  
AATCGTAATTATAAAGAACTCACATGTGACTGTTTACCTCAGCGTTTCGCATACAAAAGCTCATGCGAACTCGCGAAGCATAACCCTTCGATTGTTTCCACA  
CTATGCAACCTACTCCATCGATTCTTCTAGCAGCCTTGCTTGGGGTATTGTTGATCTACAACCTTCATTTCAAGGTGGCTTCGTGCACCGACTCAACAGGTT  
AATGGCCCCCTTATCCTACAATCCCCGTAAGTACTGACGATGCCAGAACAGCTGAGGCACATCCCTACAATCGGTTTCGTCCGGGATATTGTCCTCATACTTTGG  
CGCATTCAAGTTTTTCCGGCATGGACGCGAAATGATTCAAGAAGGGTACACCAAAGTATGTAATTTGACGCCTCTAGATACTTGGTGGGTTTTGACATGGG  
TCCAAGTATTATGGGACTGCCTTCAAGGTGCCGACCATTTCAAGATGGGTGGTTGTAGTCAGTGGGCCCCAGATGCTCGATGATATTCGGCGAGCAACC  
GATGACCAACTGTCCTTCAGGGAAGCGGTGGCTGAAGTAATGTTTTGAACATAGTTTAAACATTCTCTCGCTGACTTAGGTGGTGCAGCTCTTCAAACCG  
ACTACATGATTGGCCGTCAAATTCGCCGAGACCCTTACCACGTCAATGTTGTCCGGTCAGCATTGACTAGAAATCTCGCAATTCGTTTTCCAGACATCAAG  
GACGAGATCGCCAGTGCATTTCGTCATCTCATCCCCGTGACACAGGAGGGCATGTCGATACTCCTATTCTTTCTGCTCTTGATCTGATATTATCGACAGG  
GTGGACAACCTGTTCCGGCCACAAGACGGTTCGTCAGATTGTATGCAGGATCAGCAATCGCTTGTTCGTTGGCTTACCTTTGTGTAAGTT
